# Supplementary material for: Synthesis and antimicrobial activity of aminoalkyl resveratrol derivatives inspired by cationic peptides
Source: PubMed Central journal article supplement (PMC9828810; doi:10.1080/14756366.2022.2146685), 2023-01-04
Supplement: IENZ_A_2146685_SM2136.pdf [file IENZ_A_2146685_SM2136.pdf]

## **Synthesis and antimicrobial activity of aminoalkyl resveratrol derivatives inspired by cationic peptides.**

Rubén Cebrián,<sup>a,b\*</sup> Ricardo Lucas,<sup>c</sup> María Victoria Fernández-Cantos,<sup>a</sup> Koen Slot,<sup>a</sup> Pablo Peñalver,<sup>d</sup> Marta Martínez-García,<sup>a</sup> Antonio Párraga-Leo,<sup>c</sup> María Violante de Paz,<sup>c</sup> Federico García,<sup>b</sup> Oscar P. Kuipers<sup>a,\*</sup> and Juan Carlos Morales<sup>d,\*</sup>

### **Affiliations**

<sup>a</sup>Department of Molecular Genetics, Groningen Biomolecular Sciences and Biotechnology Institute, University of Groningen, Nijenborgh 7, 9747AG, Groningen, The Netherlands.

<sup>b</sup>Department of Clinical Microbiology, Instituto de Investigación Biosanitaria ibs. GRANADA, University Hospital Clínico San Cecilio, Av. de la Innovación s/n, 18061, Granada, Spain.

<sup>c</sup>Department of Organic and Pharmaceutical Chemistry, School of Pharmacy, University of Seville, 41012, Seville, Spain.

<sup>d</sup>Department of Biochemistry and Molecular Pharmacology and Department of Cellular Biology and Immunology. Instituto de Parasitología y Biomedicina López Neyra, CSIC, PTS Granada, Avda. del Conocimiento, 17, 18016 Armilla, Granada, Spain.

### **Corresponding Authors**

\* R.C.: phone, +34-958021781 ; e-mail: rcebrian@ugr.es

\* O.P.K.: phone, +31-503632093; email: o.p.kuipers@rug.nl

\* J.C.M.: phone, +34-958181644; e-mail: jcmorales@ipb.csic.es

## Table of Contents.

|                                                                                                                             |               |
|-----------------------------------------------------------------------------------------------------------------------------|---------------|
| <b>Supplementary Figure 1.</b> <i>E. coli</i> LMG 8224 outer membrane permeabilization by the different amino RES designed. | Page S2       |
| <b>Supplementary Figure 2.</b> <i>E. coli</i> LMG 8224 inner membrane permeabilization by the different amino RES designed. | Page S3       |
| <b>Supplementary Figure 3.</b> Haemolytic activity of the different amino RES derivatives                                   | Page S4       |
| <b>Supplementary Table 1.</b> Selective index HC <sub>50</sub> /MIC                                                         | Page S5       |
| <b><sup>1</sup>H and <sup>13</sup>C-NMR spectra of intermediates 10, 13-20</b>                                              | Pages S6-S14  |
| <b><sup>1</sup>H and <sup>13</sup>C-NMR spectra of final compounds 2-8</b>                                                  | Pages S15-S21 |
| <b>High resolution mass spectra of final compounds 2-8</b>                                                                  | Pages S22-S25 |
| <b>HPLC chromatograms of final compounds 2-8</b>                                                                            | Pages S26-S28 |

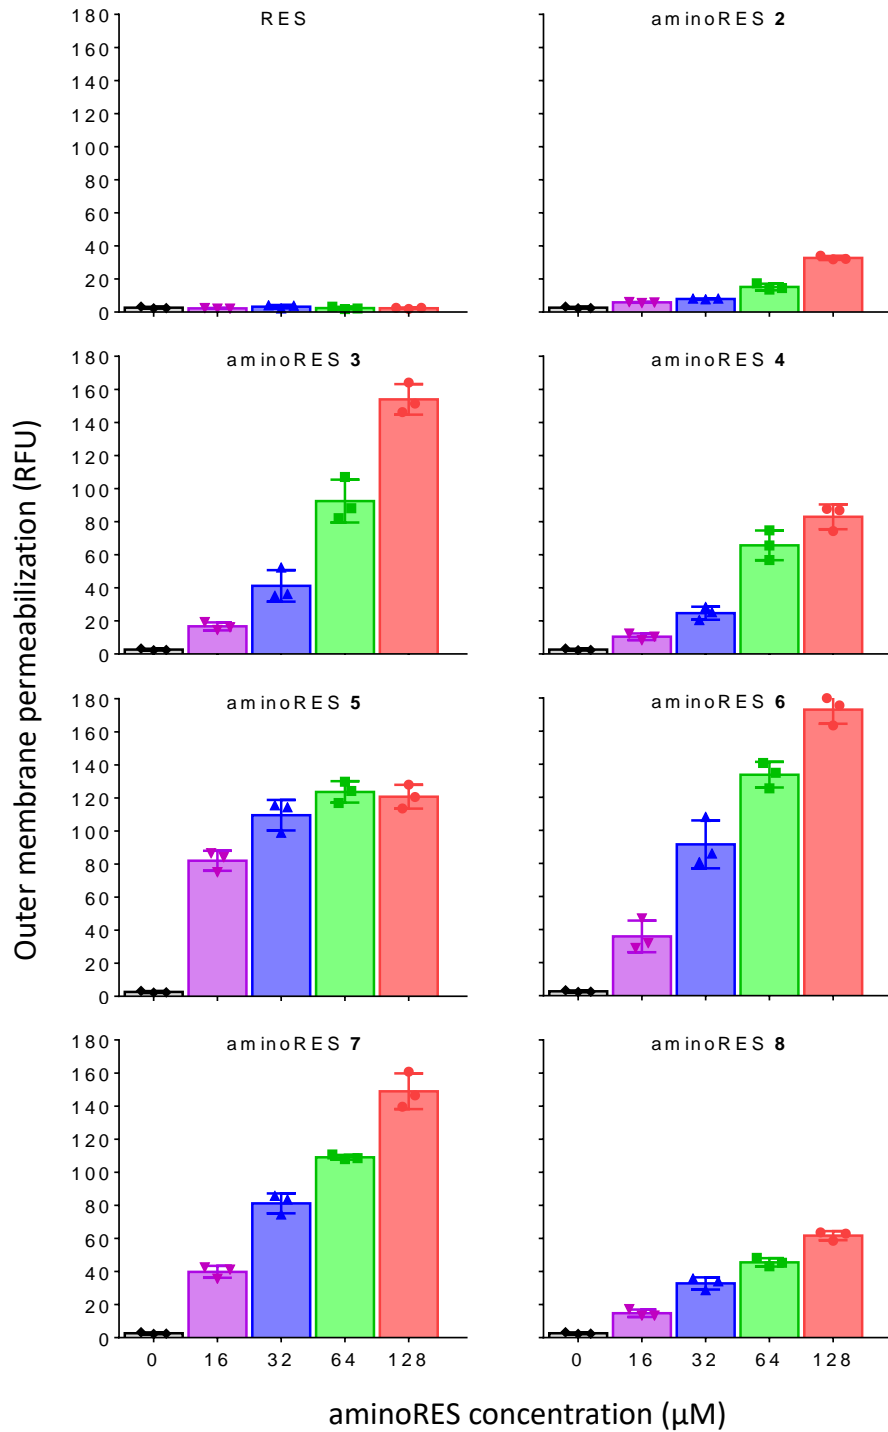

**Supplementary figure 1:** *E. coli* LMG 8224 outer membrane permeabilization by the different amino RES designed.

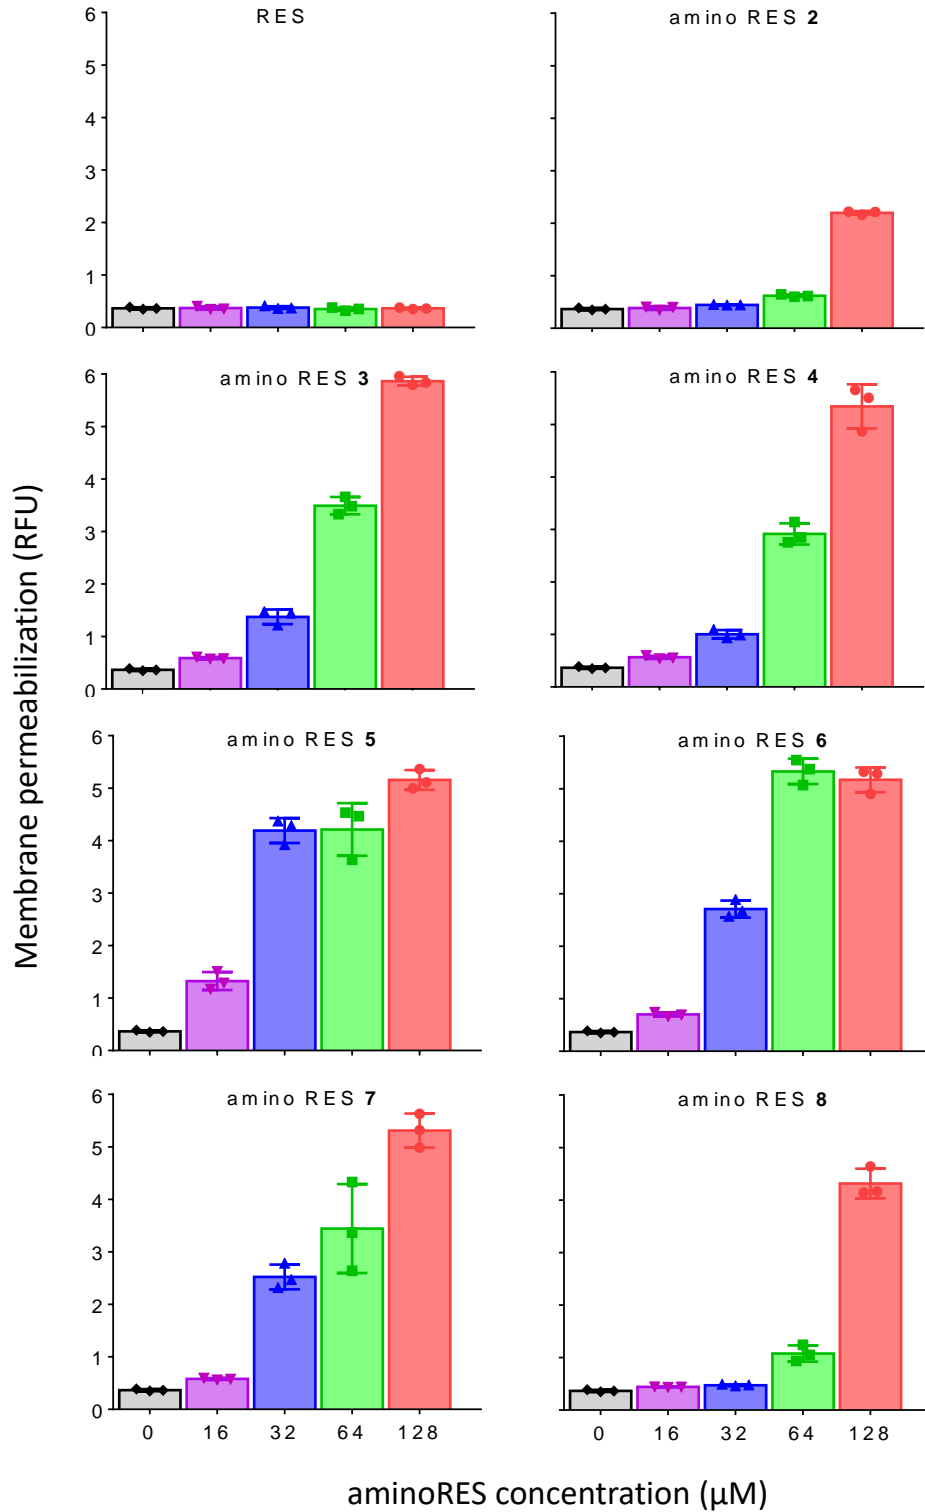

**Supplementary figure 2:** *E. coli* LMG 8224 inner membrane permeabilization by the different amino RES designed.

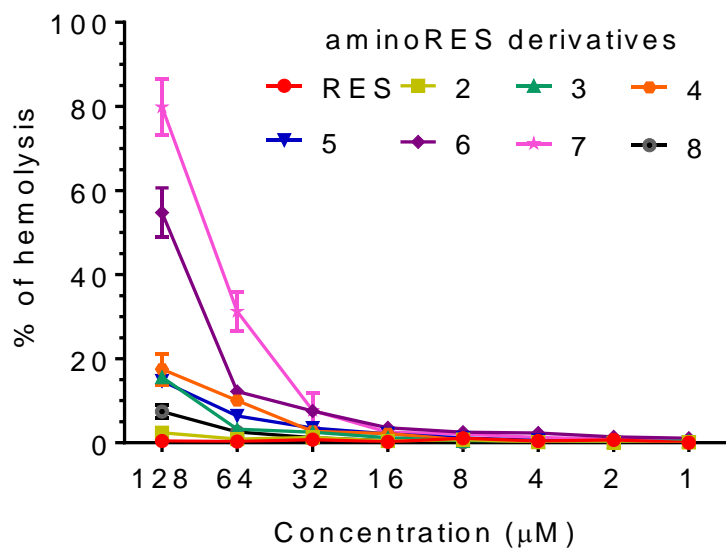

**Supplementary Figure 3:** Haemolytic activity of the different amino RES derivatives.

|                                             | RES  | 2    | 3     | 4    | 5     | 6      | 7     | 8    |
|---------------------------------------------|------|------|-------|------|-------|--------|-------|------|
| HC <sub>50</sub>                            | >128 | >128 | >128  | >128 | >128  | 124.43 | 79.90 | >128 |
| <i>A. baumannii</i> LMG 01041               | -    | -    | 2     | 2    | 8     | -      | -     | -    |
| <i>K. aerogenes</i> LMG 02094               | -    | -    | -     | -    | 4     | -      | -     | -    |
| <i>E. cloacae</i> LMG 02783                 | -    | -    | 2     | 2    | 8     | -      | -     | -    |
| <i>E. coli</i> LMG 8224                     | -    | -    | 2     | 2    | 16    | 0.97   | -     | 2    |
| <i>E. coli</i> NCTC 13846                   | -    | -    | -     | -    | 19.20 | -      | -     | 2    |
| <i>K. pneumoniae</i> LMG 20218              | -    | -    | -     | -    | 4     | -      | -     | -    |
| <i>P. aeruginosa</i> PAO1                   | -    | -    | -     | -    | 4     | -      | -     | -    |
| <i>S. enterica</i> LMG 07233                | -    | -    | -     | -    | 8     | -      | -     | 2    |
| <i>B. cereus</i> LMG 10987                  | -    | -    | 2     | 3    | 9.60  | 1.46   | 0.62  | -    |
| <i>B. cereus</i> LMG 14574                  | -    | -    | 2.4   | 4    | 8     | 3.89   | 0.62  | 2    |
| <i>E. faecalis</i> V583                     | -    | -    | -     | -    | 9.60  | -      | -     | -    |
| <i>E. faecalis</i> LMG 8222                 | -    | -    | 4.80  | 6    | 16    | 7.78   | -     | 2    |
| <i>E. faecalis</i> LMG 16716                | -    | -    | 4     | 4    | 19.20 | 7.78   | -     | -    |
| <i>E. faecium</i> LMG 11423                 | -    | -    | 4     | 8    | 16    | 15.55  | -     | 2    |
| <i>E. faecium</i> LMG 16003                 | -    | -    | 2     | 2    | 16    | -      | -     | 2    |
| <i>S. aureus</i> LMG 15975                  | -    | -    | 4.80  | 8    | 76.80 | 7.78   | 0.62  | 2    |
| <i>S. aureus</i> LMG 8223                   | -    | 2    | 6     | 6    | 32    | 15.55  | 1.25  | 2    |
| <i>S. aureus</i> LMG 10147                  | -    | -    | -     | -    | 19.20 | 0.97   | -     | 2    |
| <i>Bacteroides ovatus</i><br>3_8_47FAA      | -    | -    | 12.02 | 8    | 16    | 15.55  | 2.50  | -    |
| <i>B. fragilis</i> NCTC 9343                | -    | -    | 8     | 8    | 16    | 6.69   | 1.25  | -    |
| <i>B. salyersiae</i> DMS 18765              | -    | -    | 8     | 8    | 16    | 9.36   | 1.50  | -    |
| <i>B. xylanisolvens</i> DMS 18836           | -    | 2    | 16    | 16   | 32    | 15.55  | 2.50  | 2    |
| <i>Parabacteroides merdae</i><br>CL03T12C32 | -    | -    | -     | -    | 4     | -      | -     | -    |
| <i>C. botulinum</i> CECT 551                | 2    | 2    | 32    | 16   | 128   | 124.43 | 9.99  | 2    |
| <i>C. difficile</i> CECT 531                | -    | 2    | 16    | 16   | 64    | 31.11  | 4.99  | -    |
| <i>C. perfringens</i> CECT 376              | -    | 2    | 16    | 16   | 12    | 62.22  | -     | -    |
| <i>C. tetani</i> CECT 462                   | -    | -    | 19.20 | 16   | 32    | 124.43 | 3.75  | -    |

**Supplementary table 1:** Selective index HC<sub>50</sub>/MIC. For the compounds in which HC<sub>50</sub> was not detected in the assay 2X the higher tested concentration was used in the calculations.

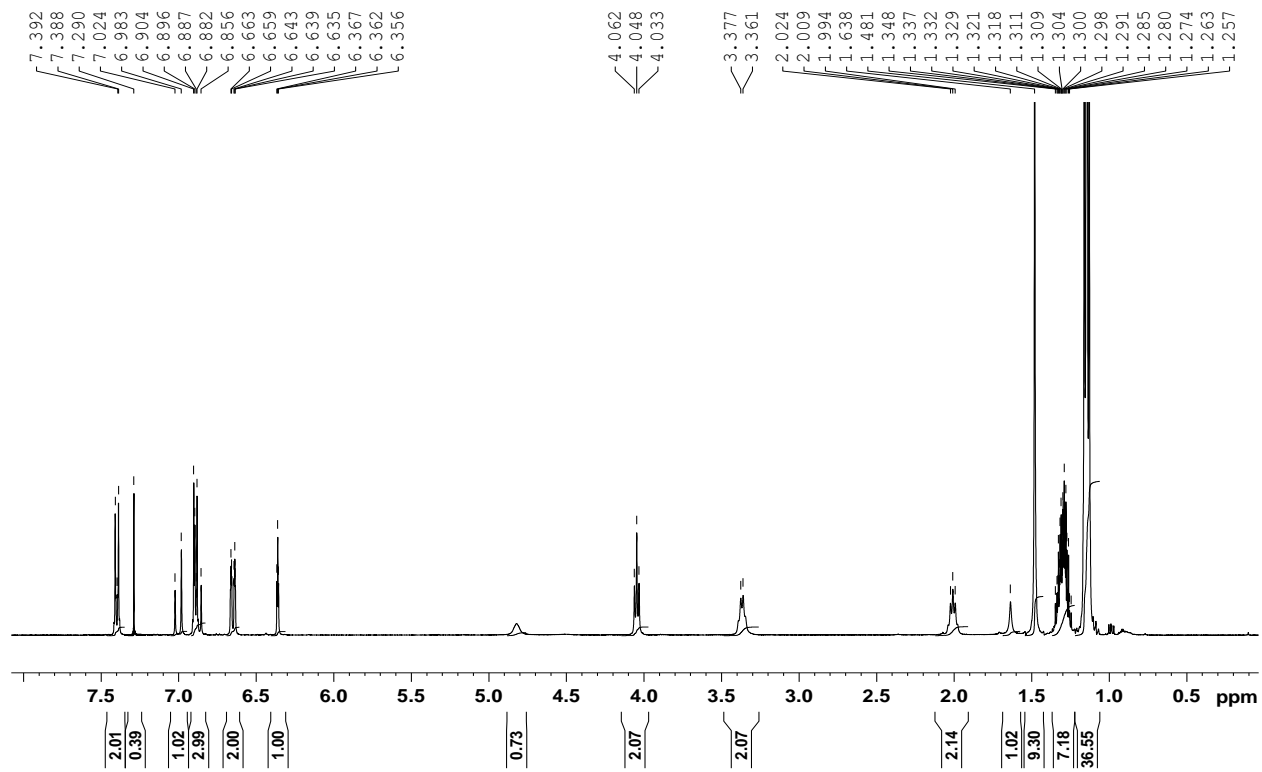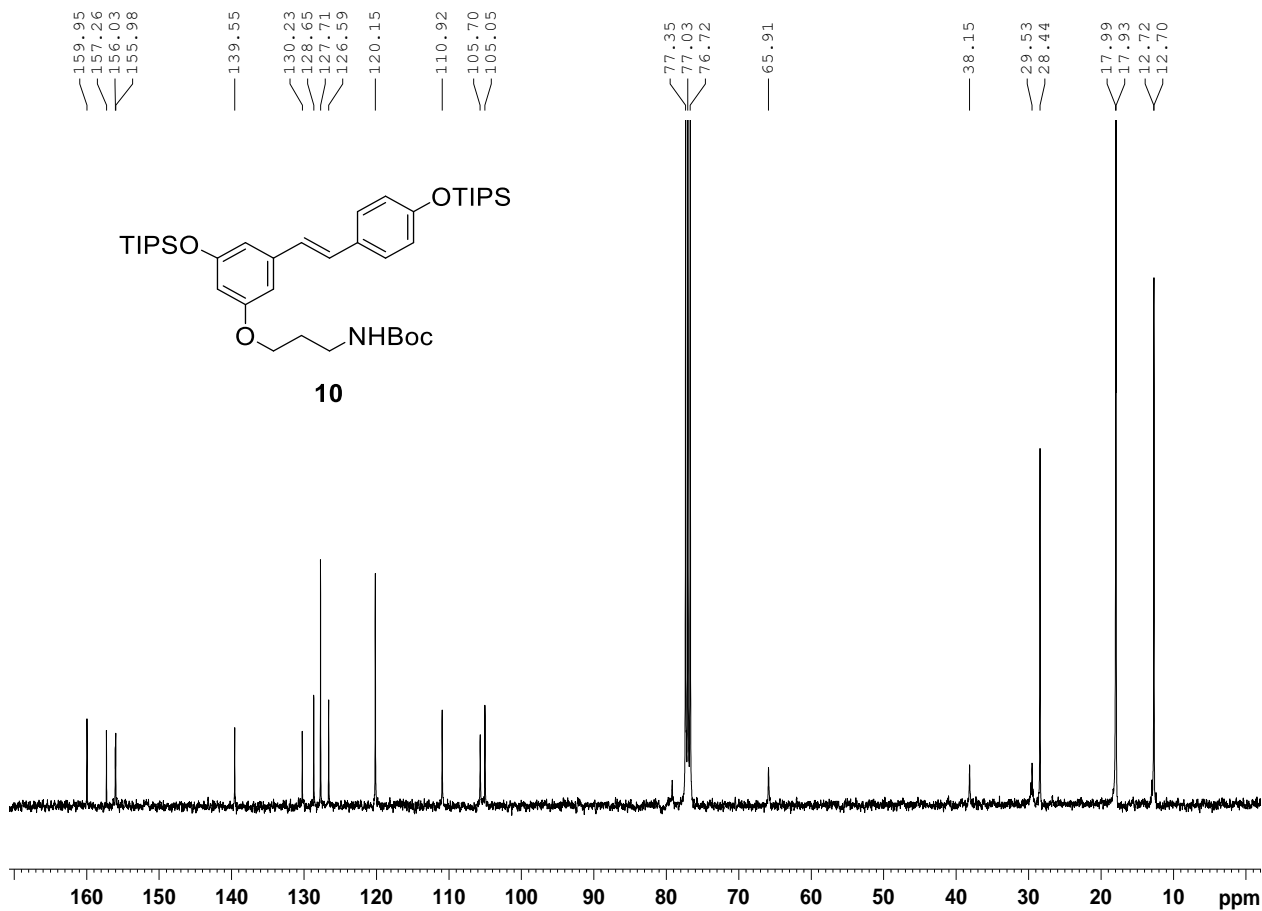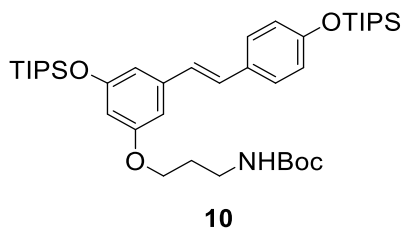

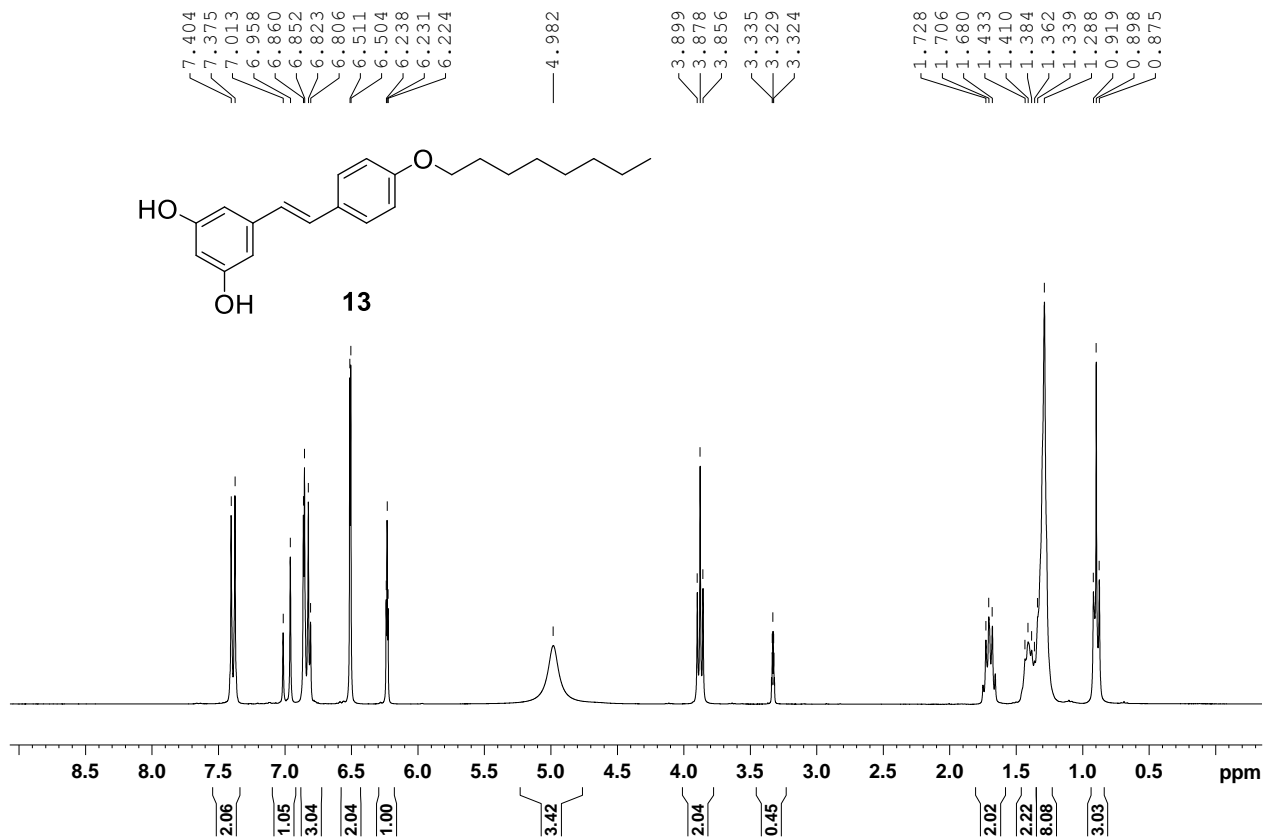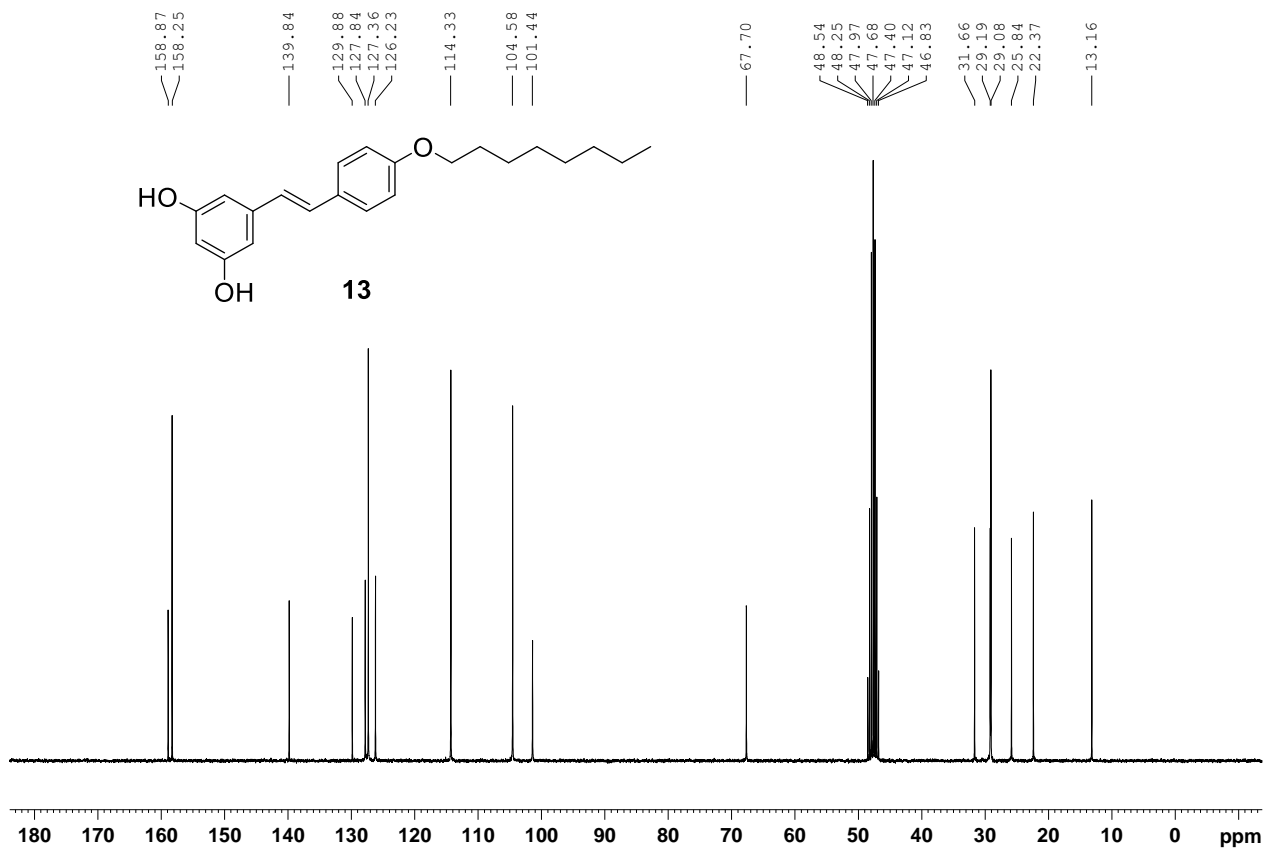



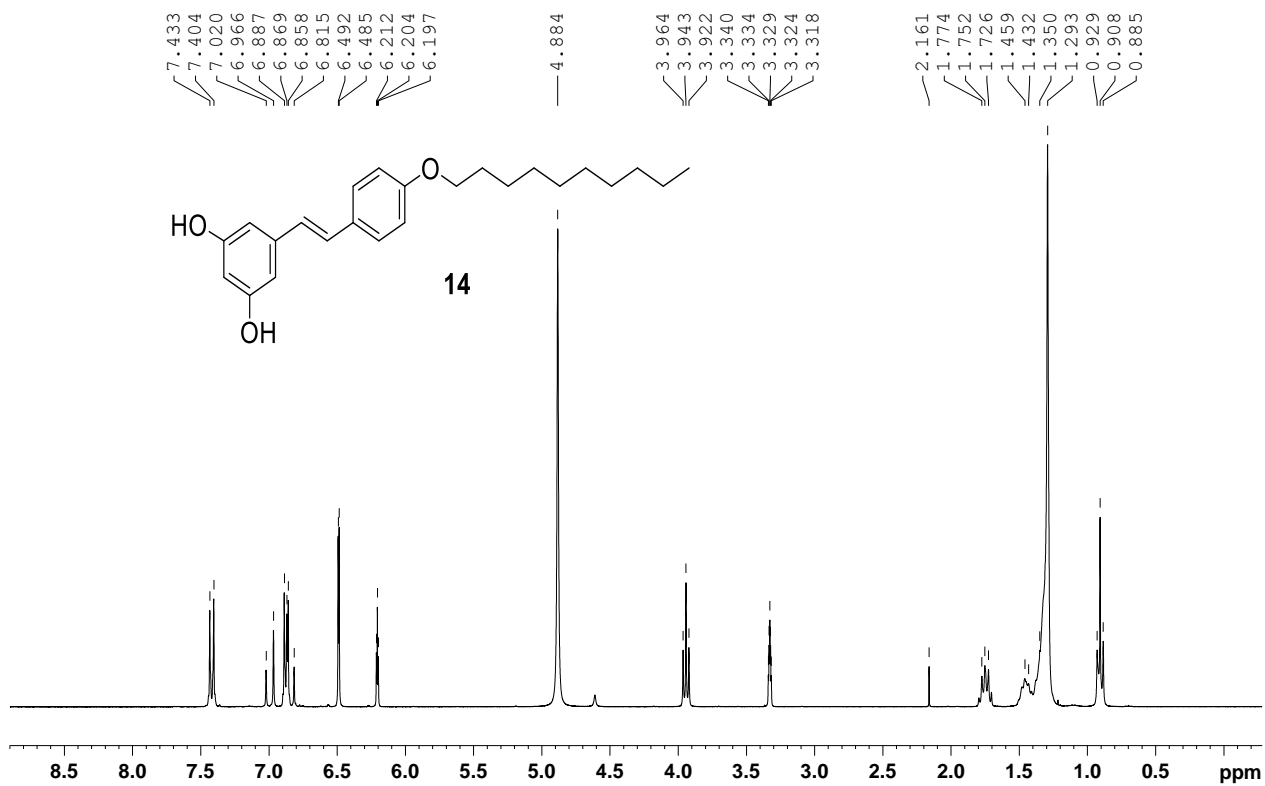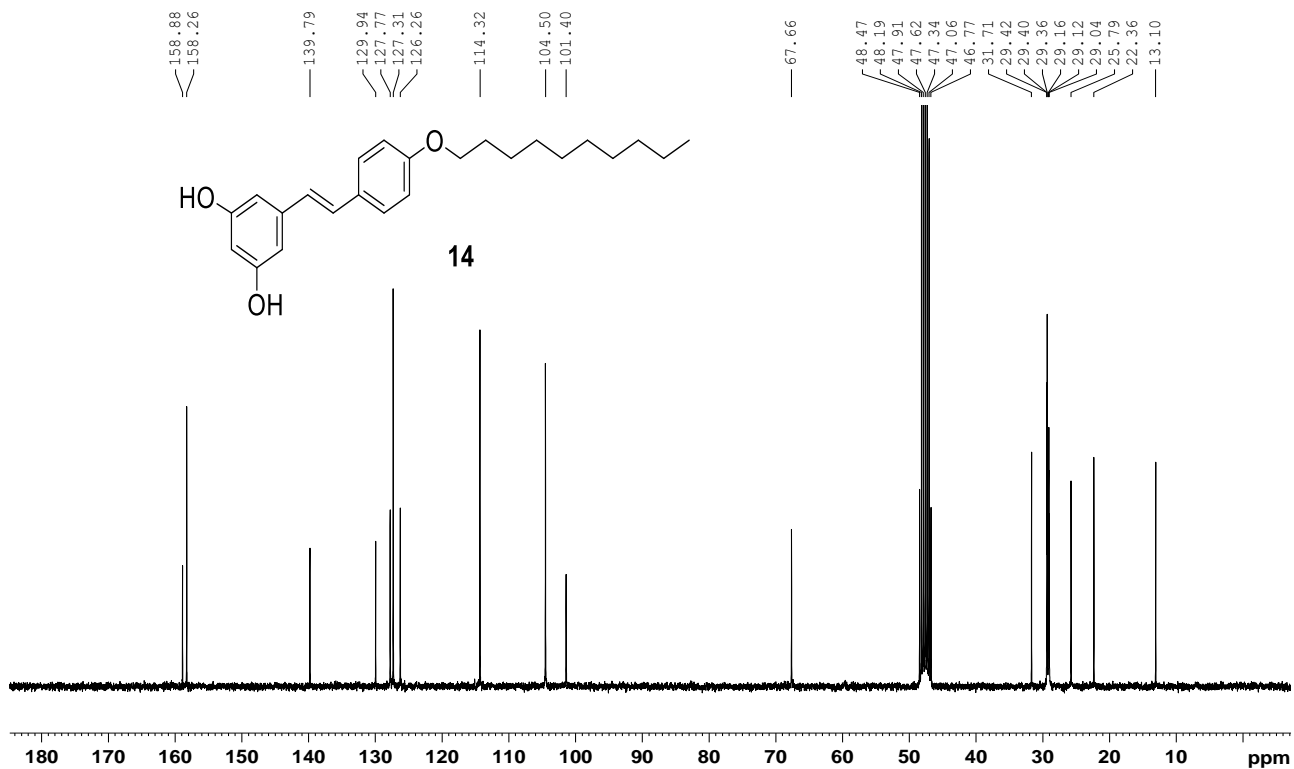

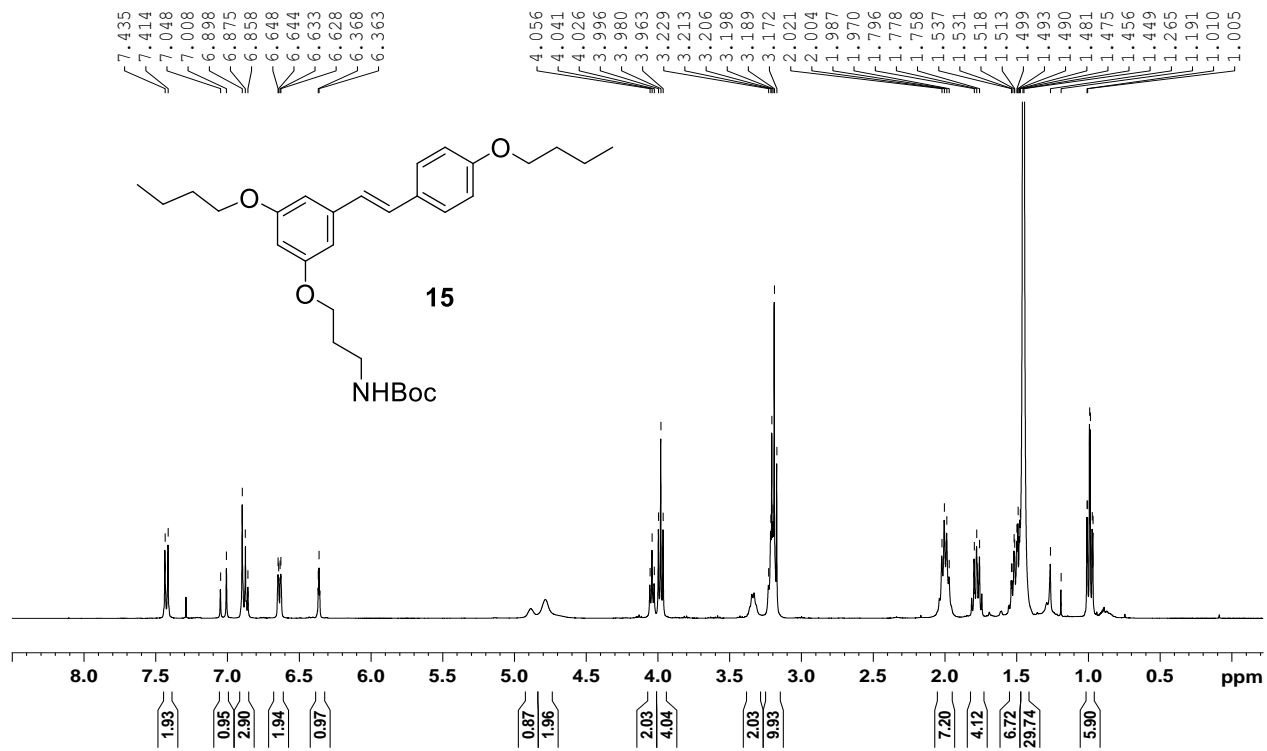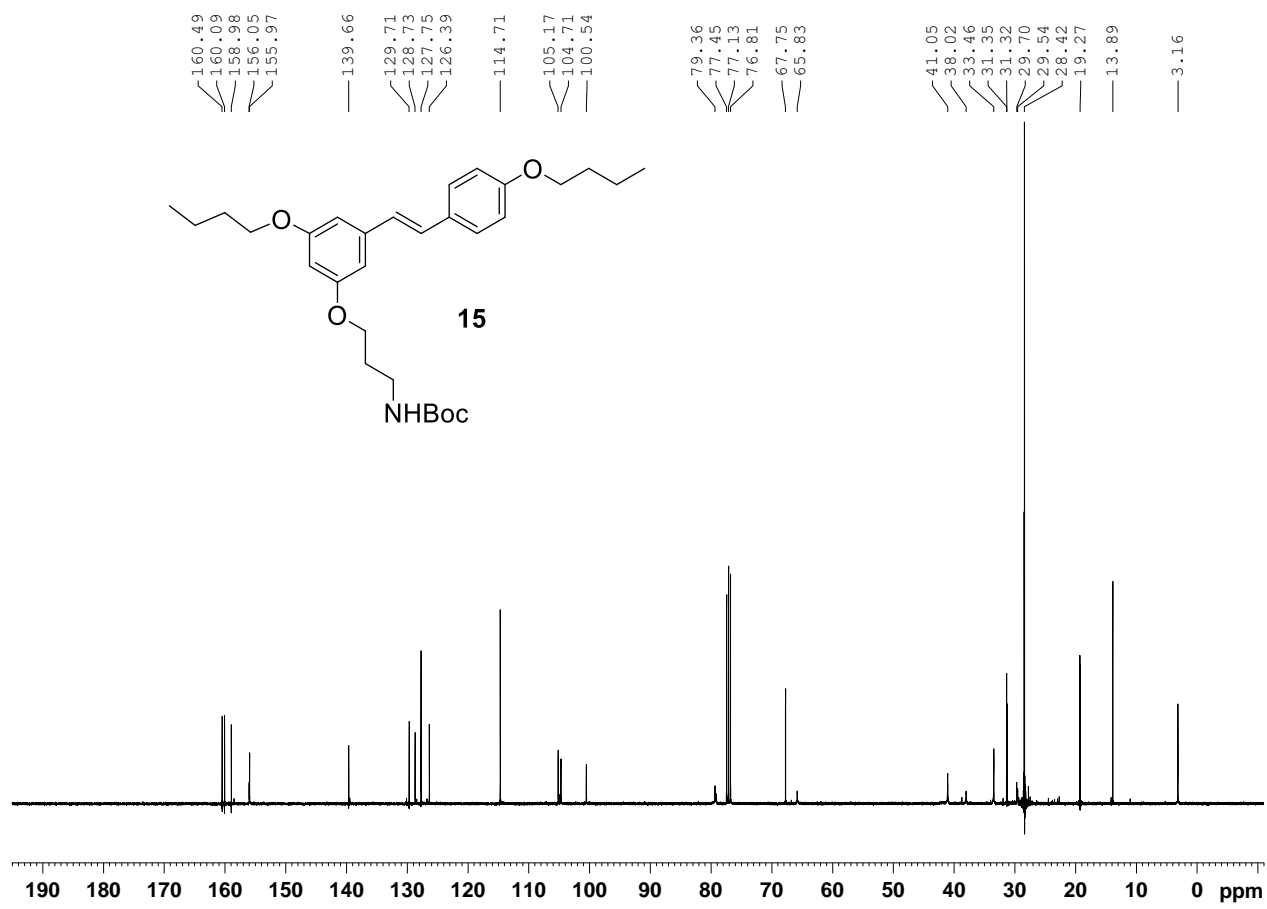

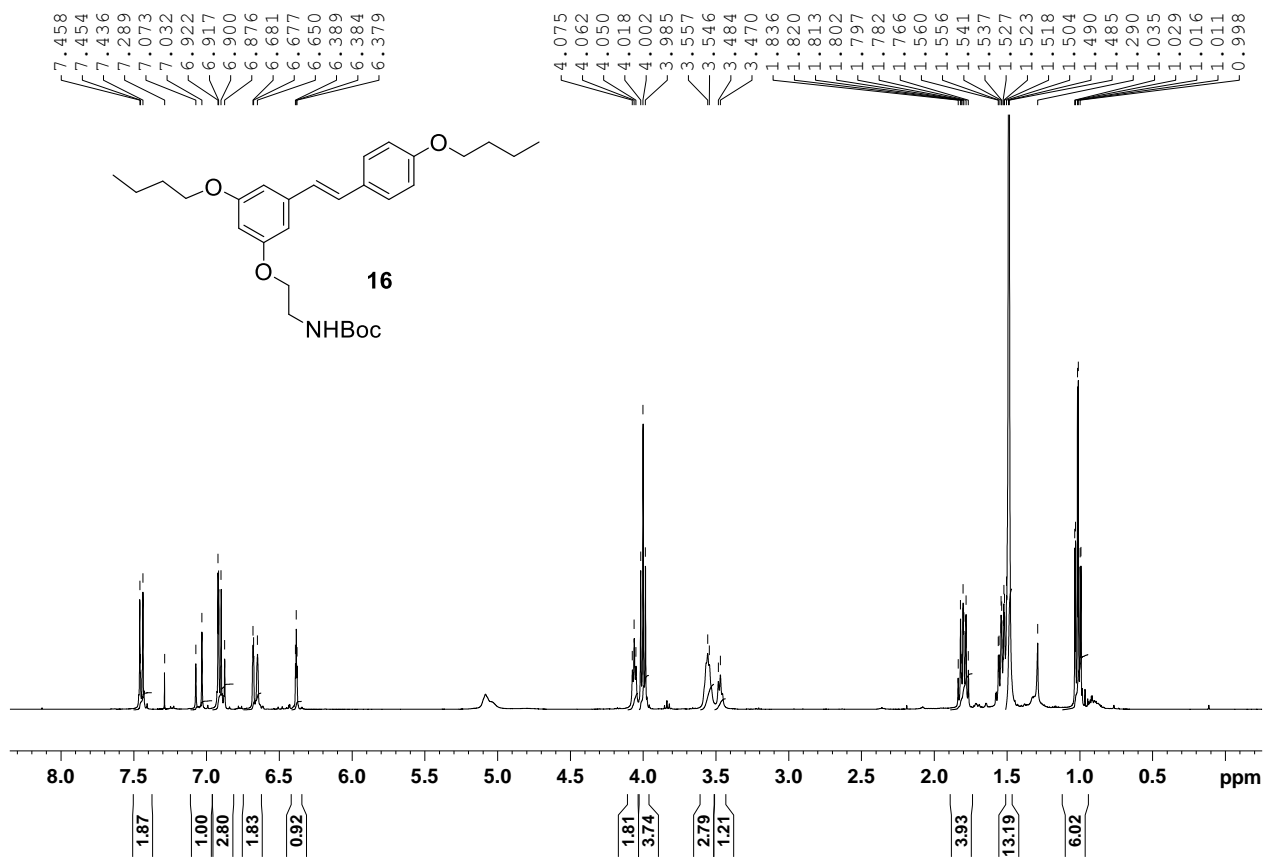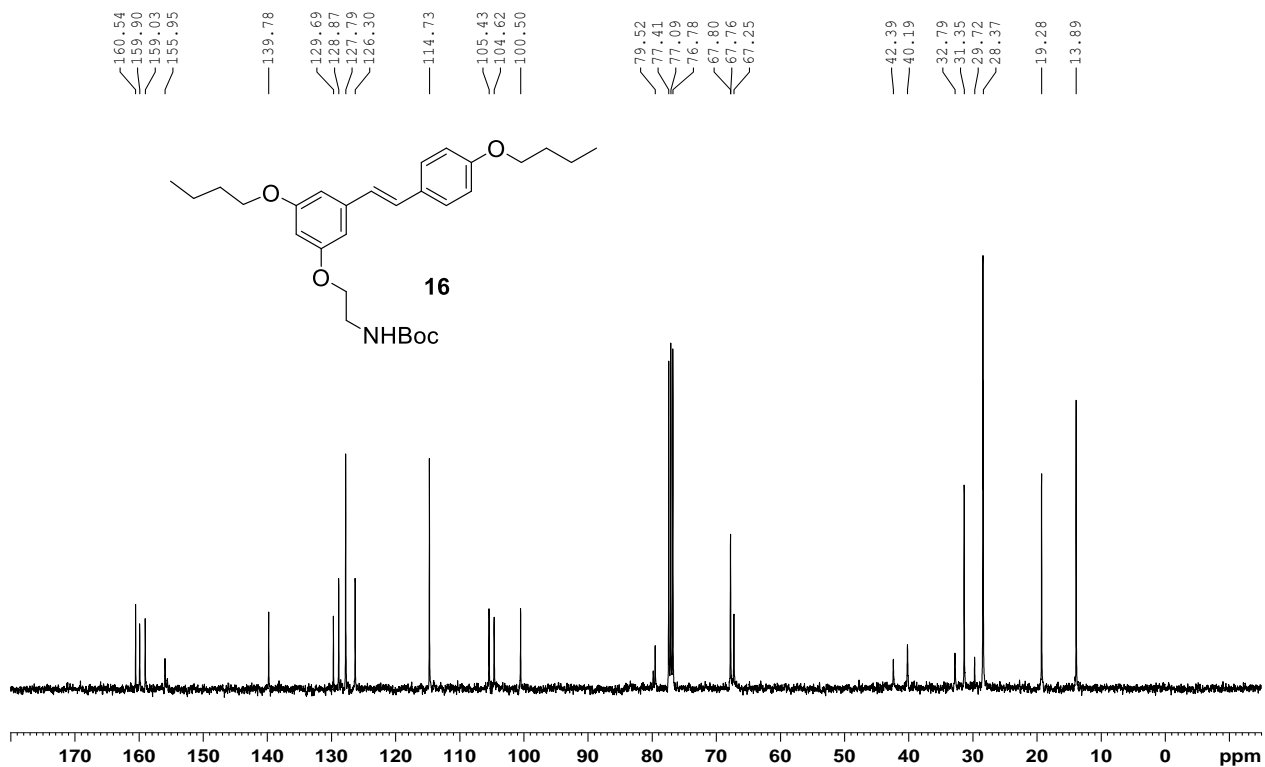

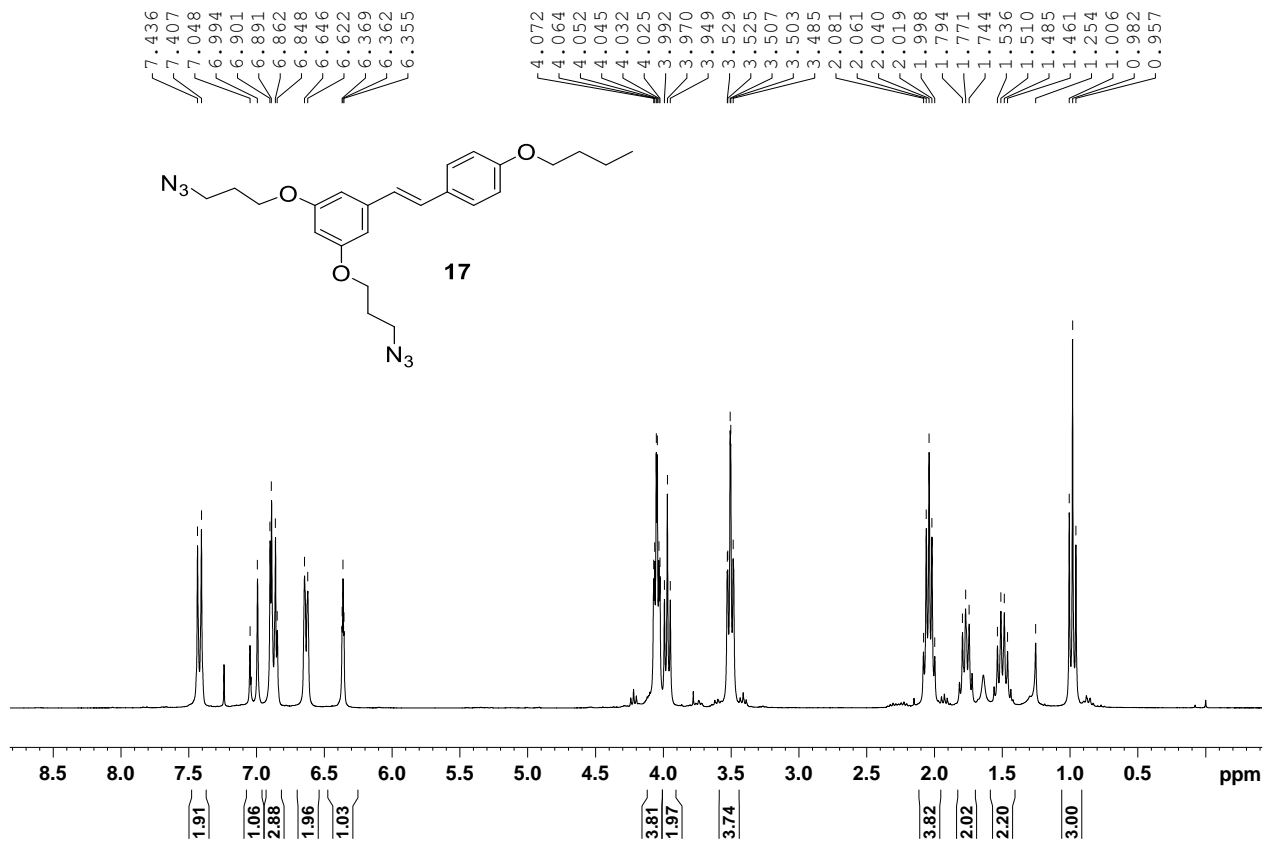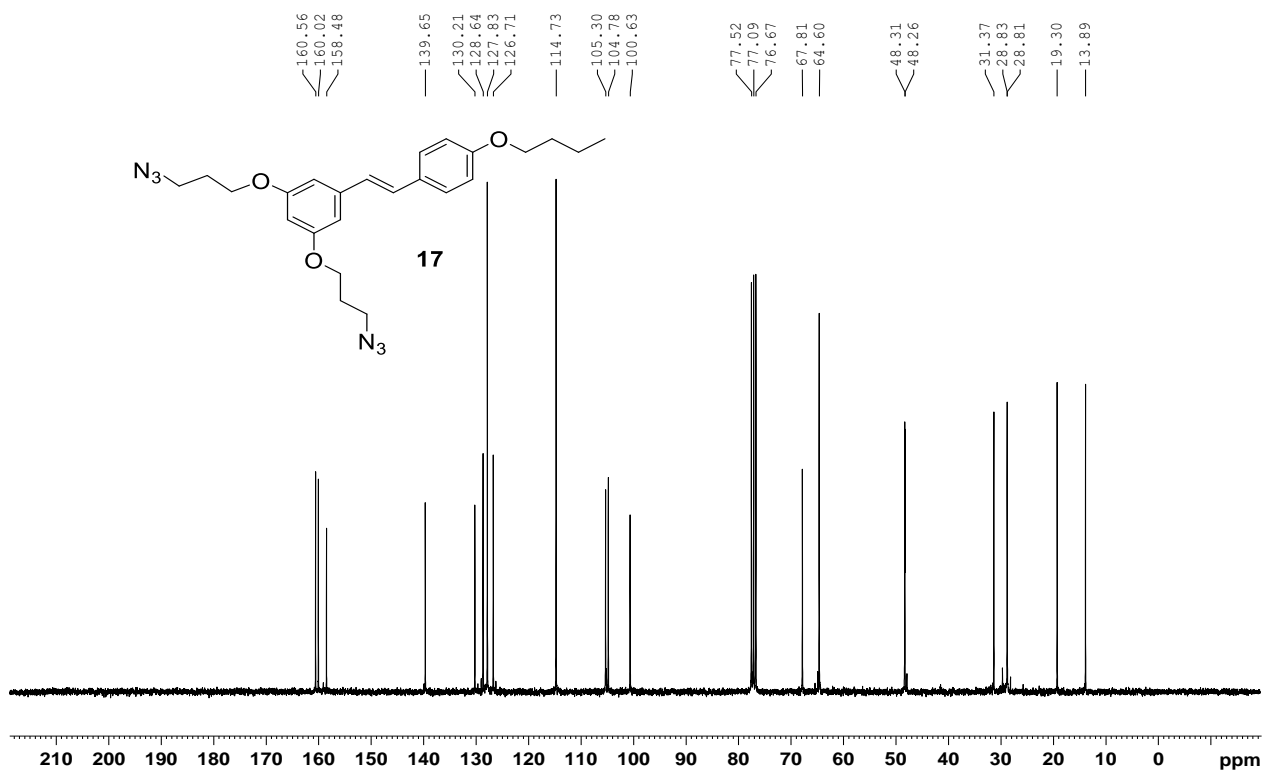

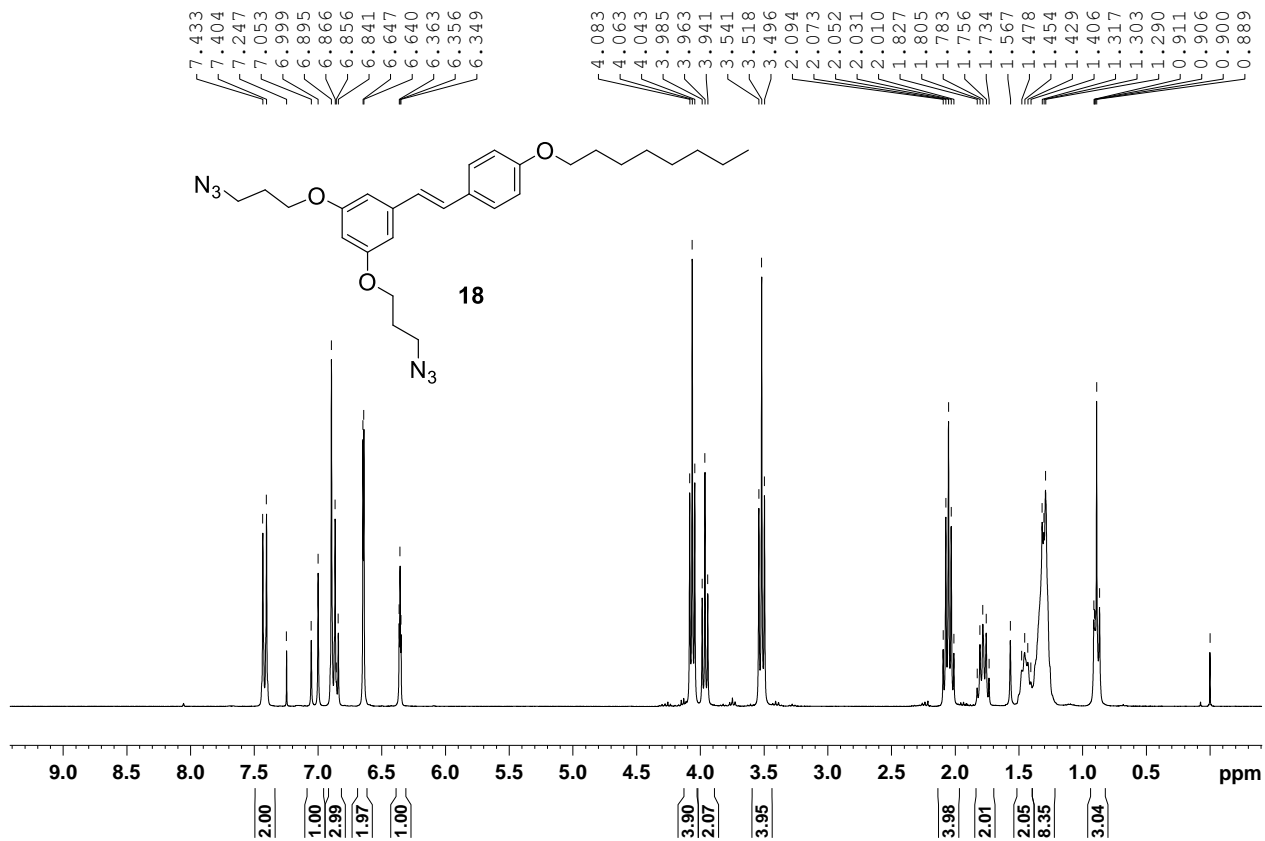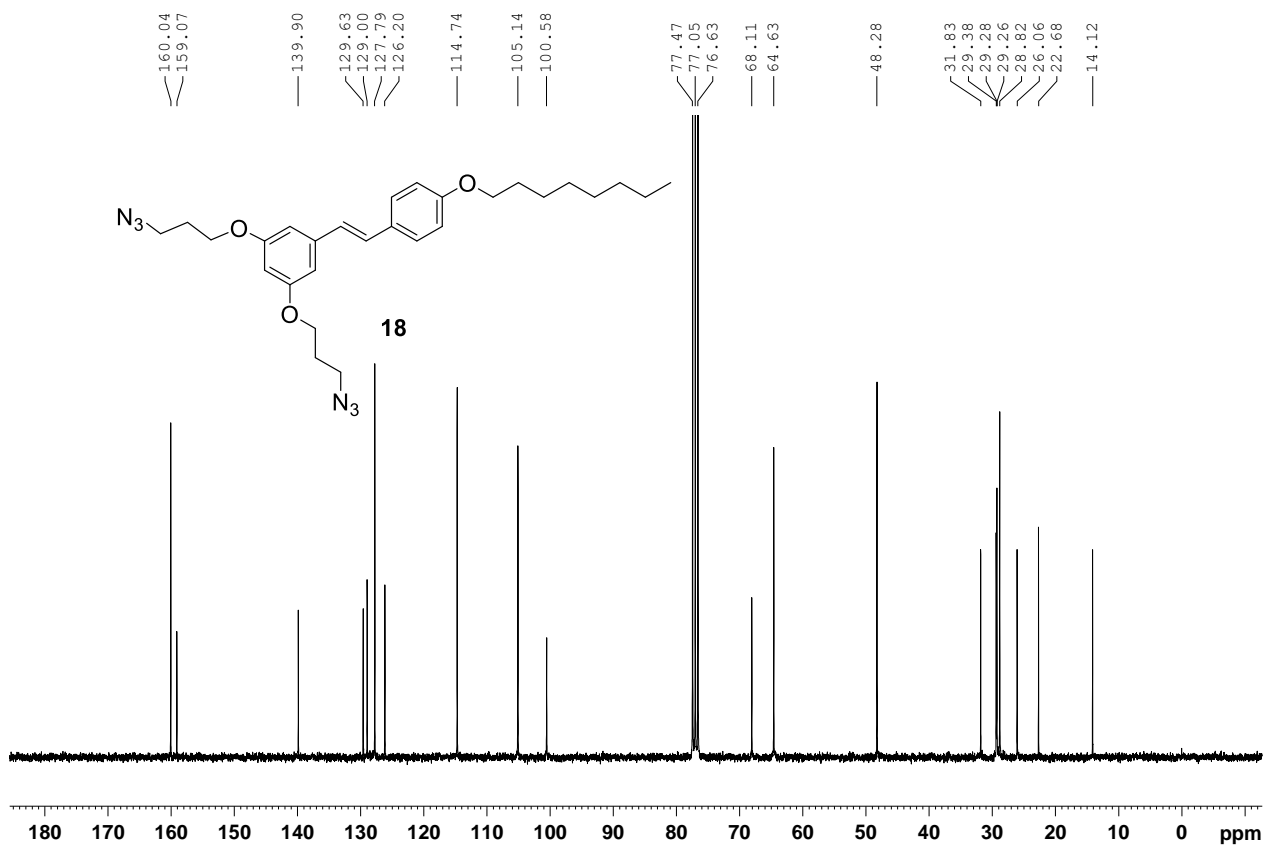

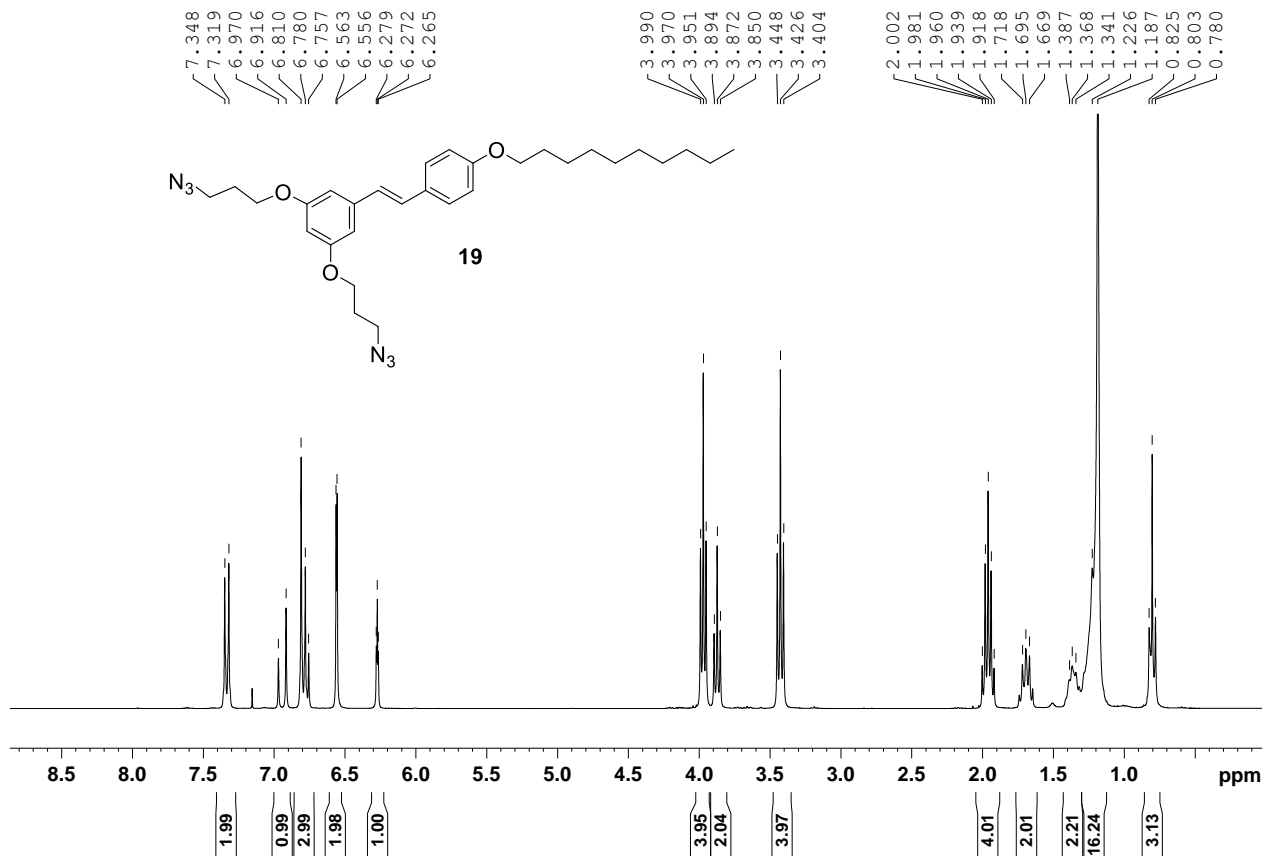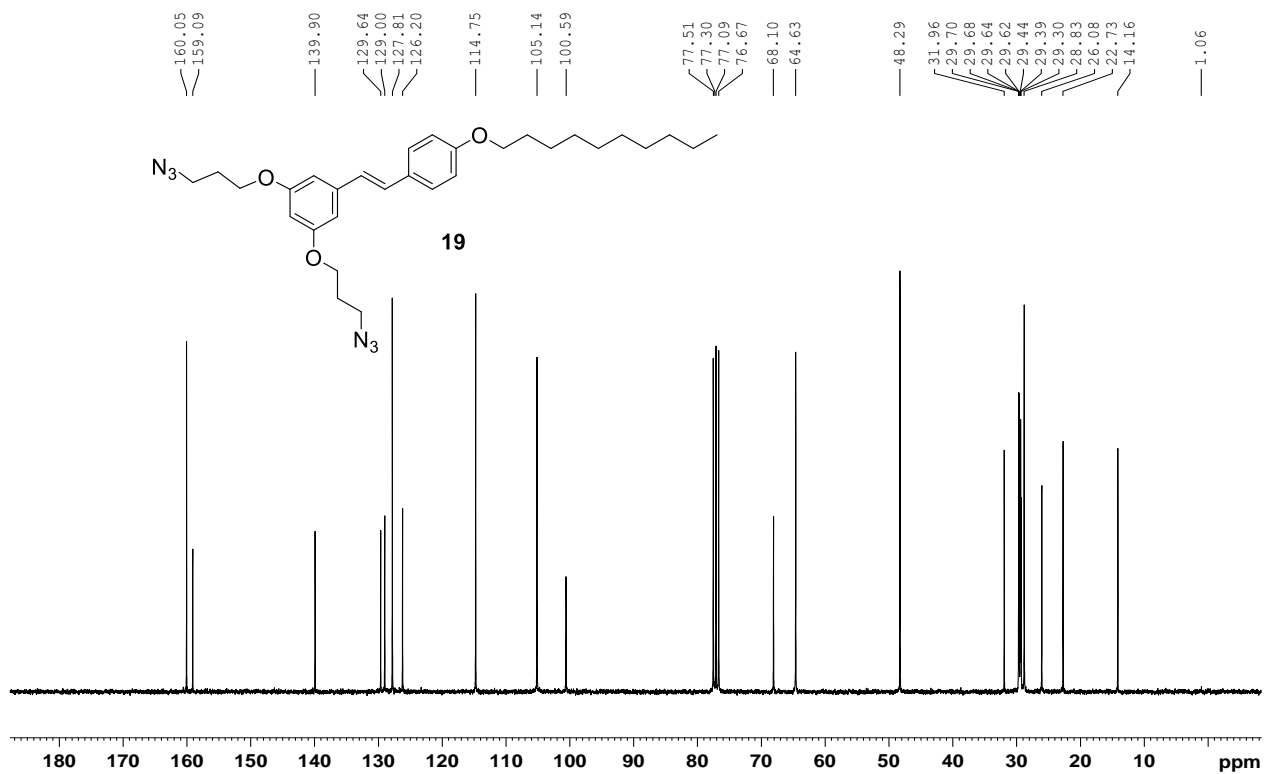

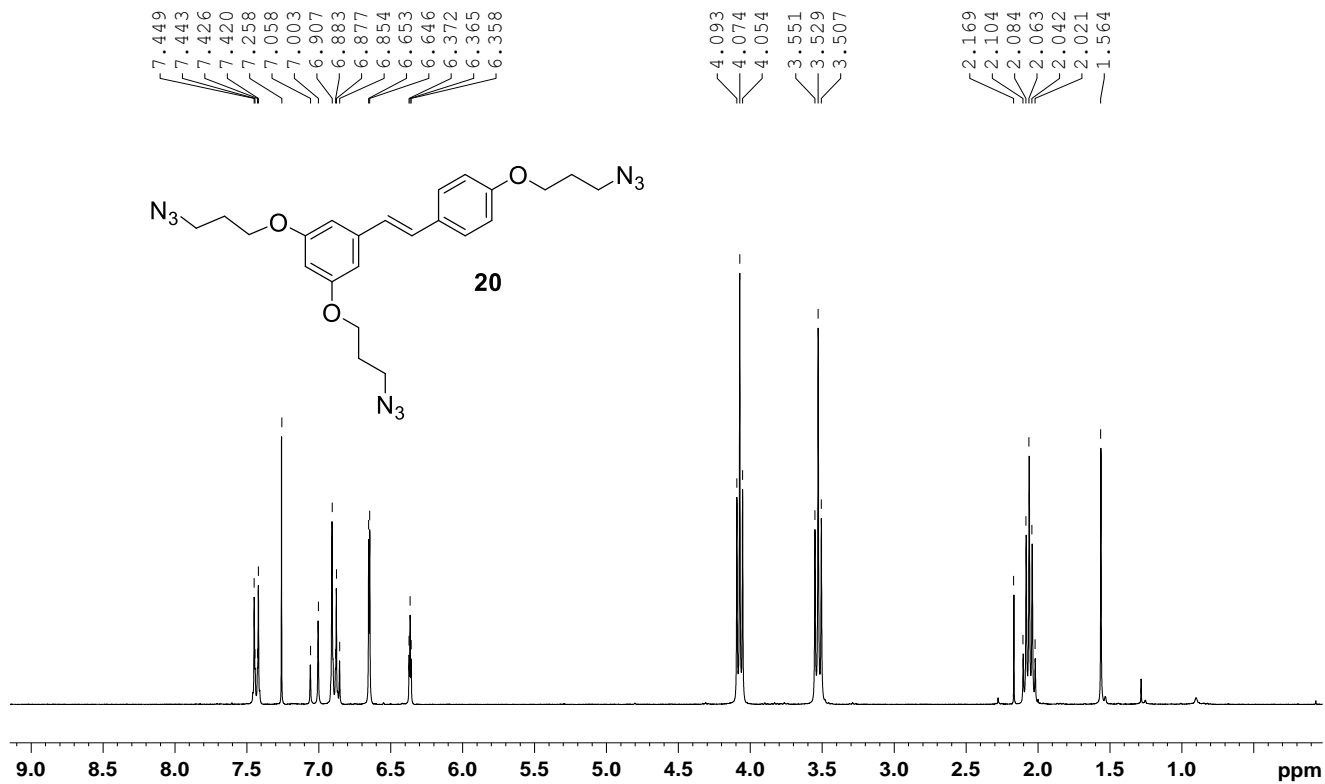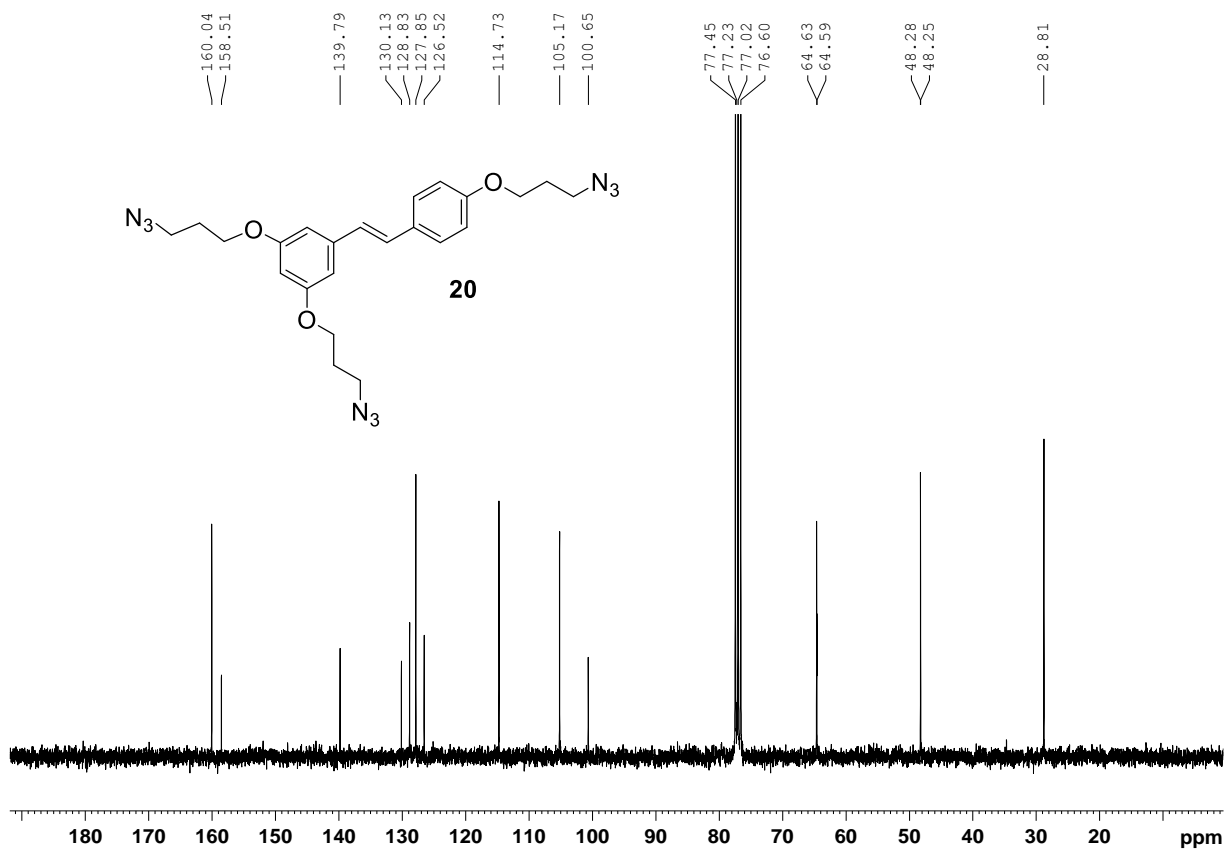

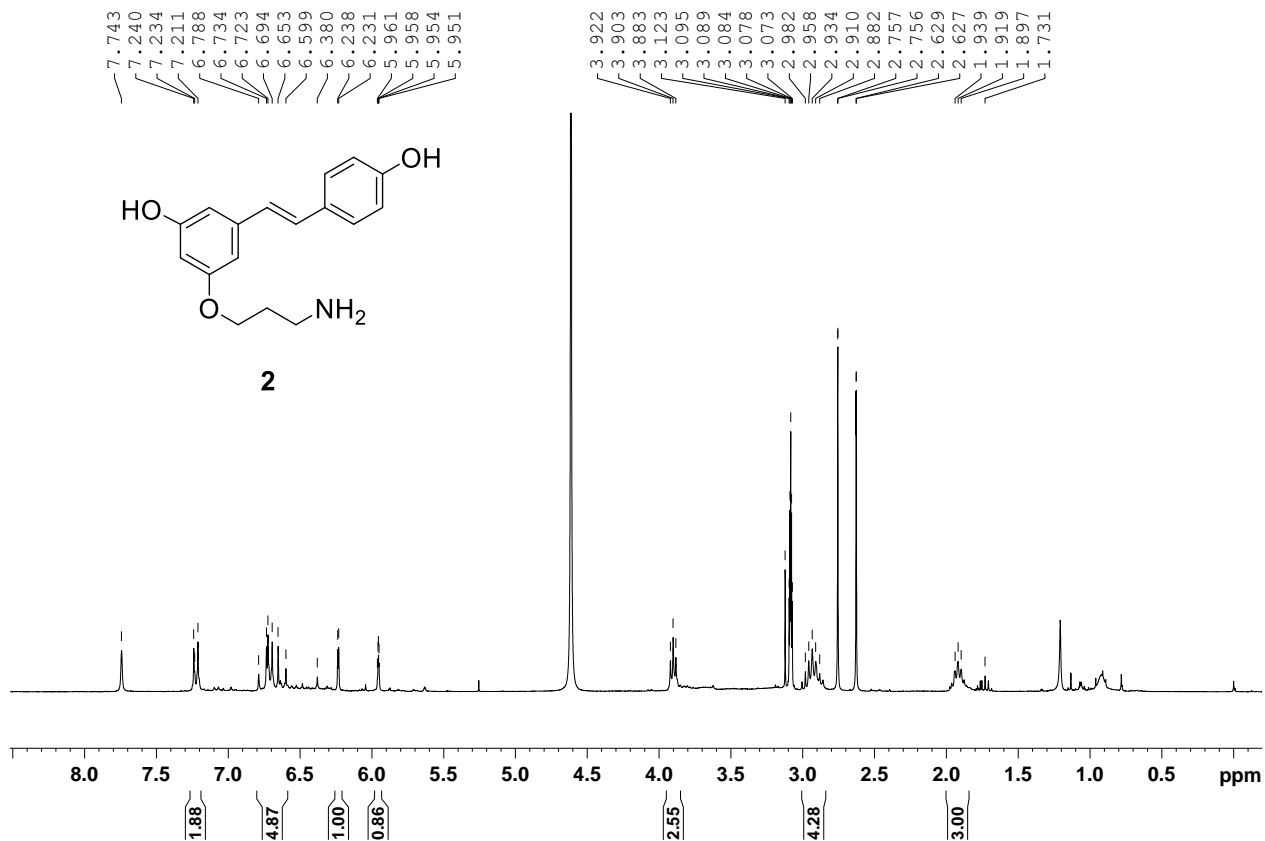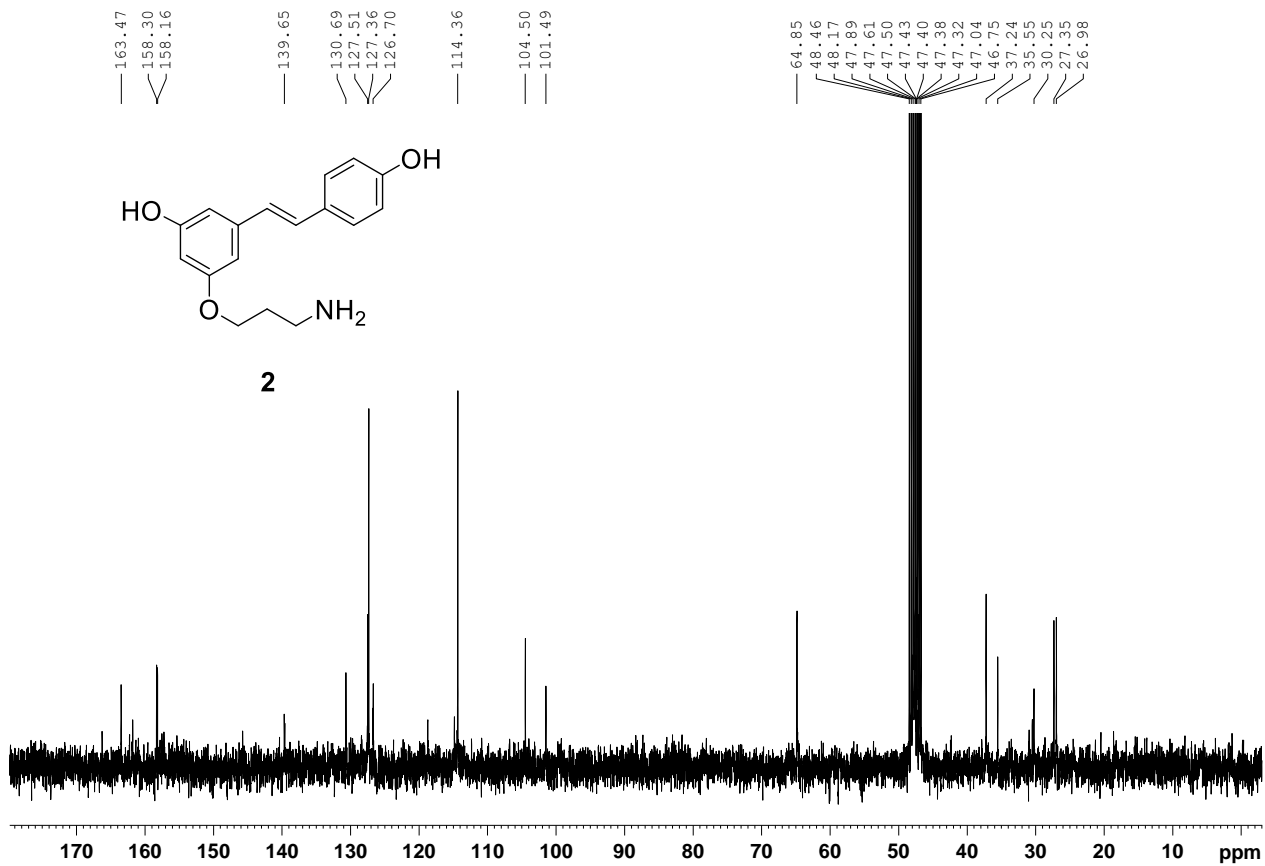



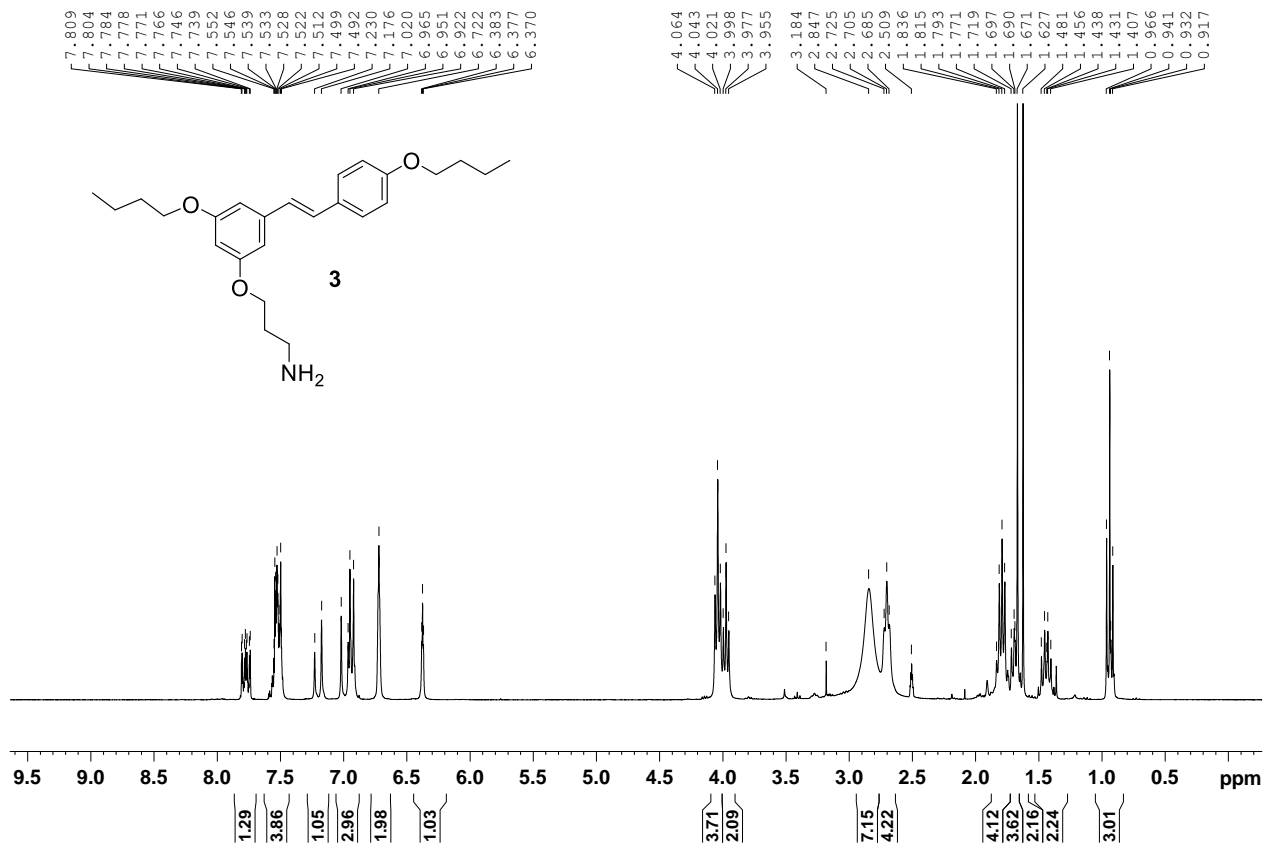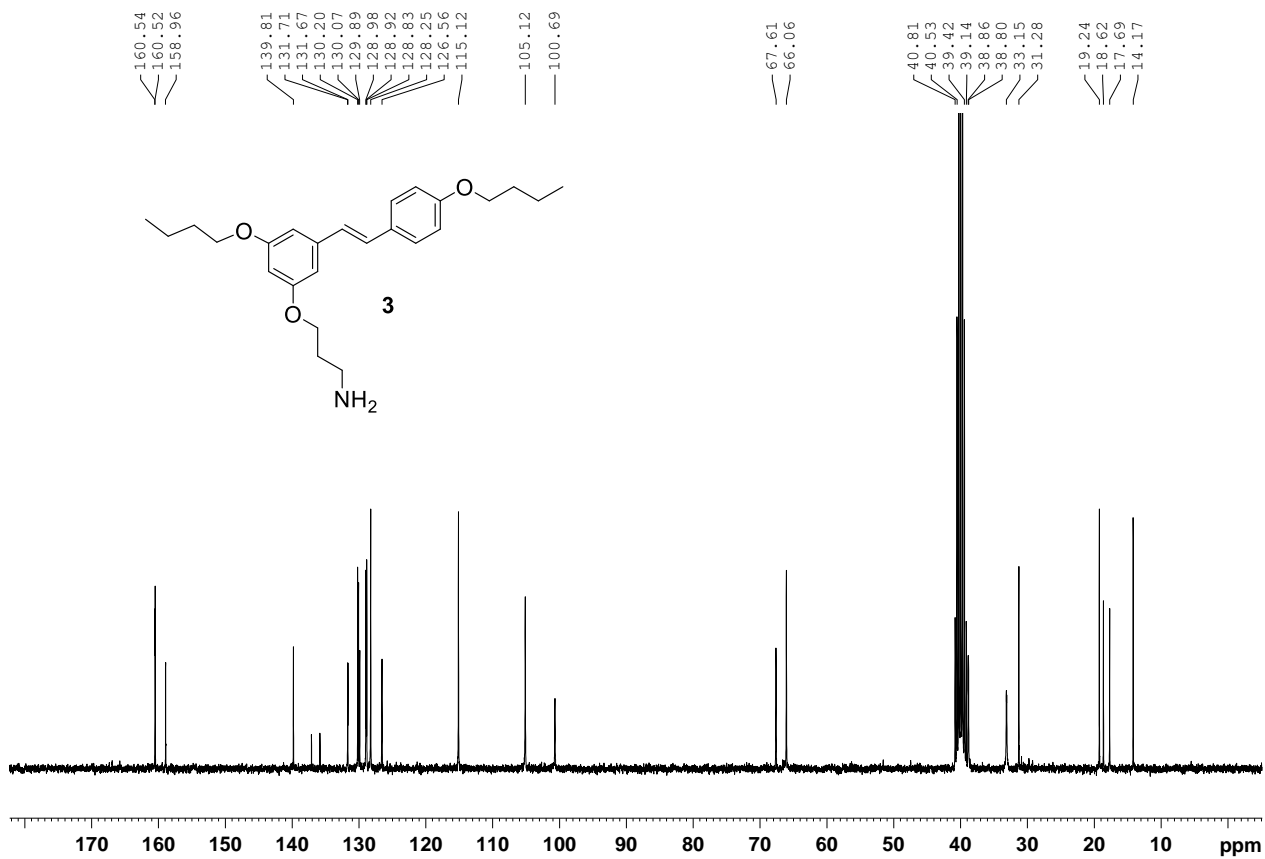

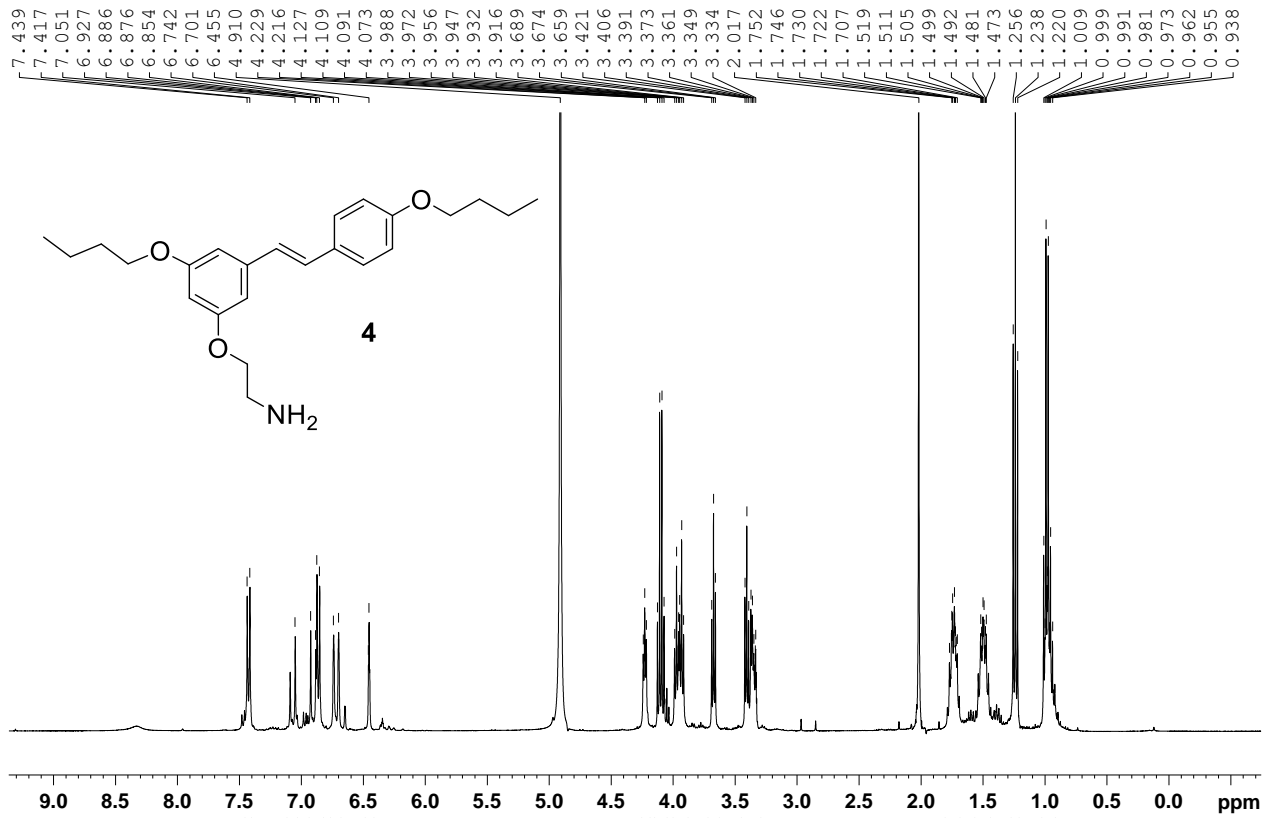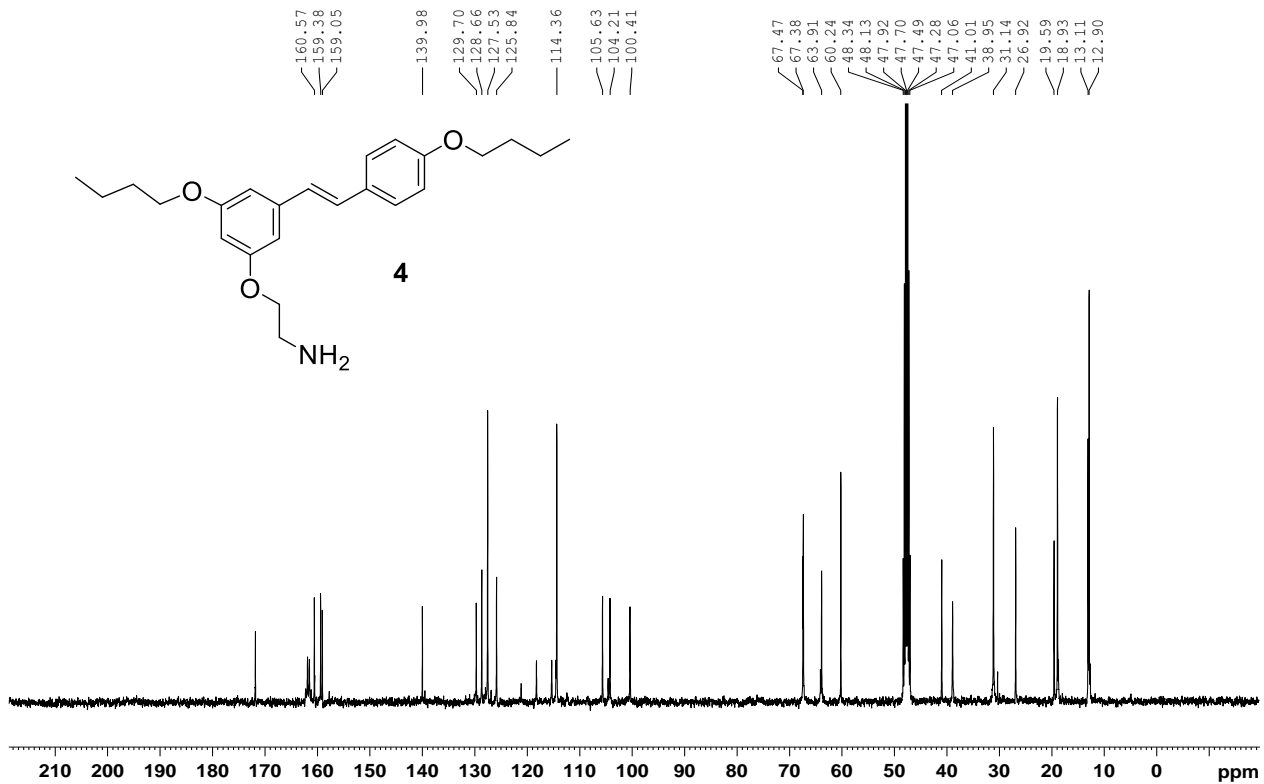

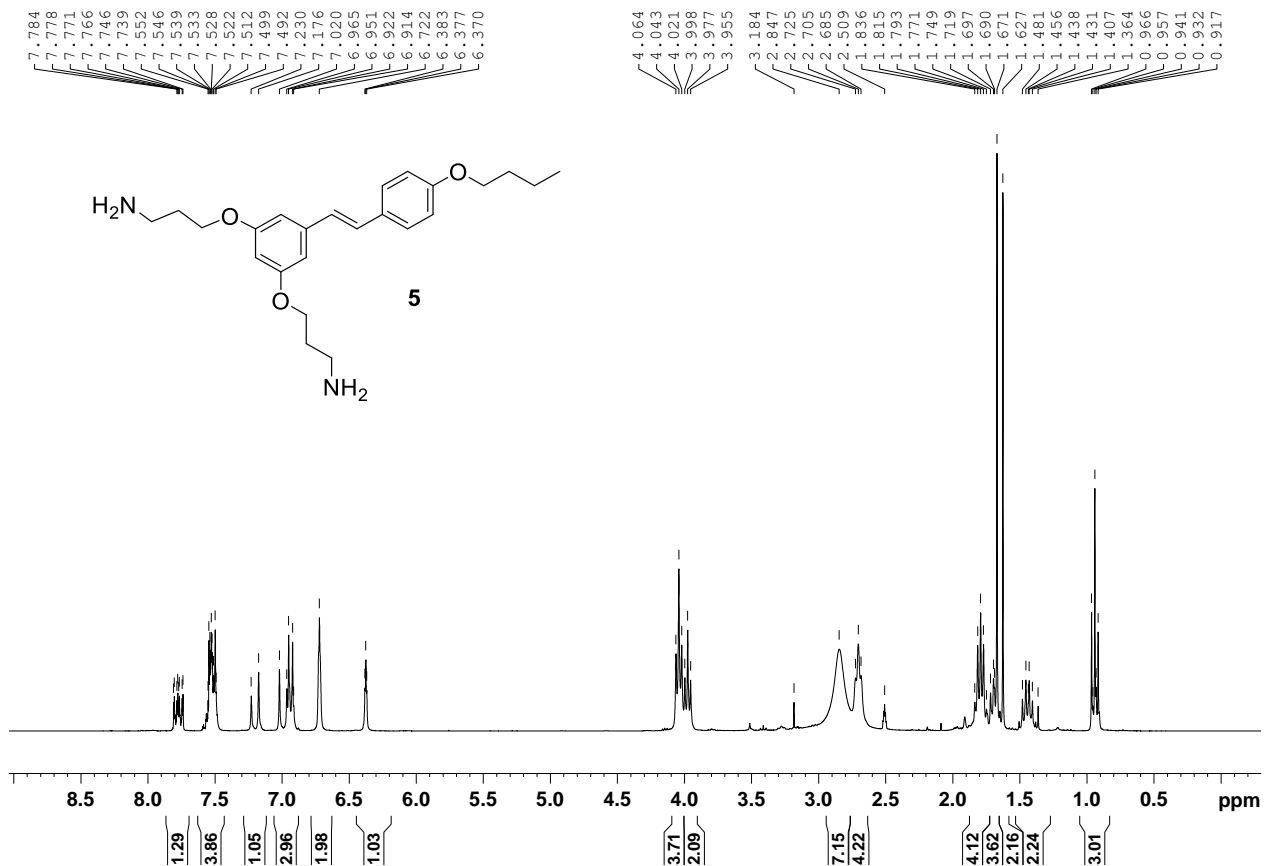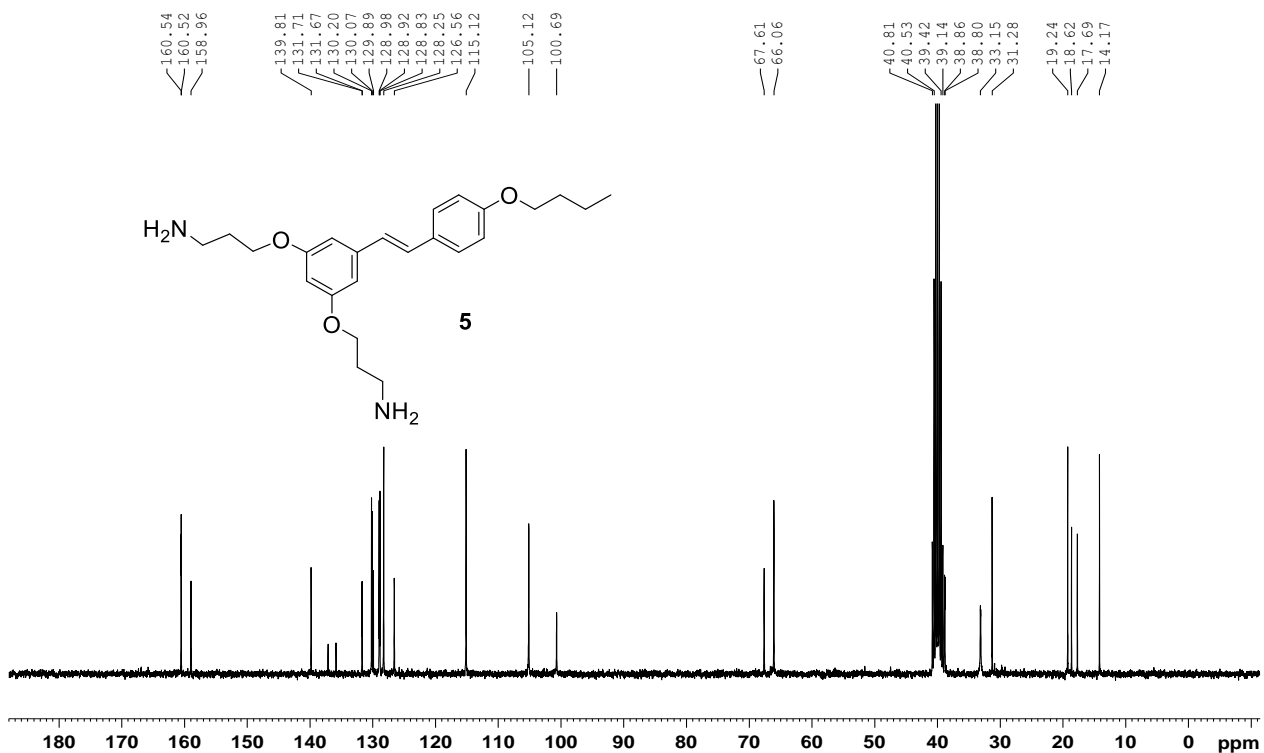

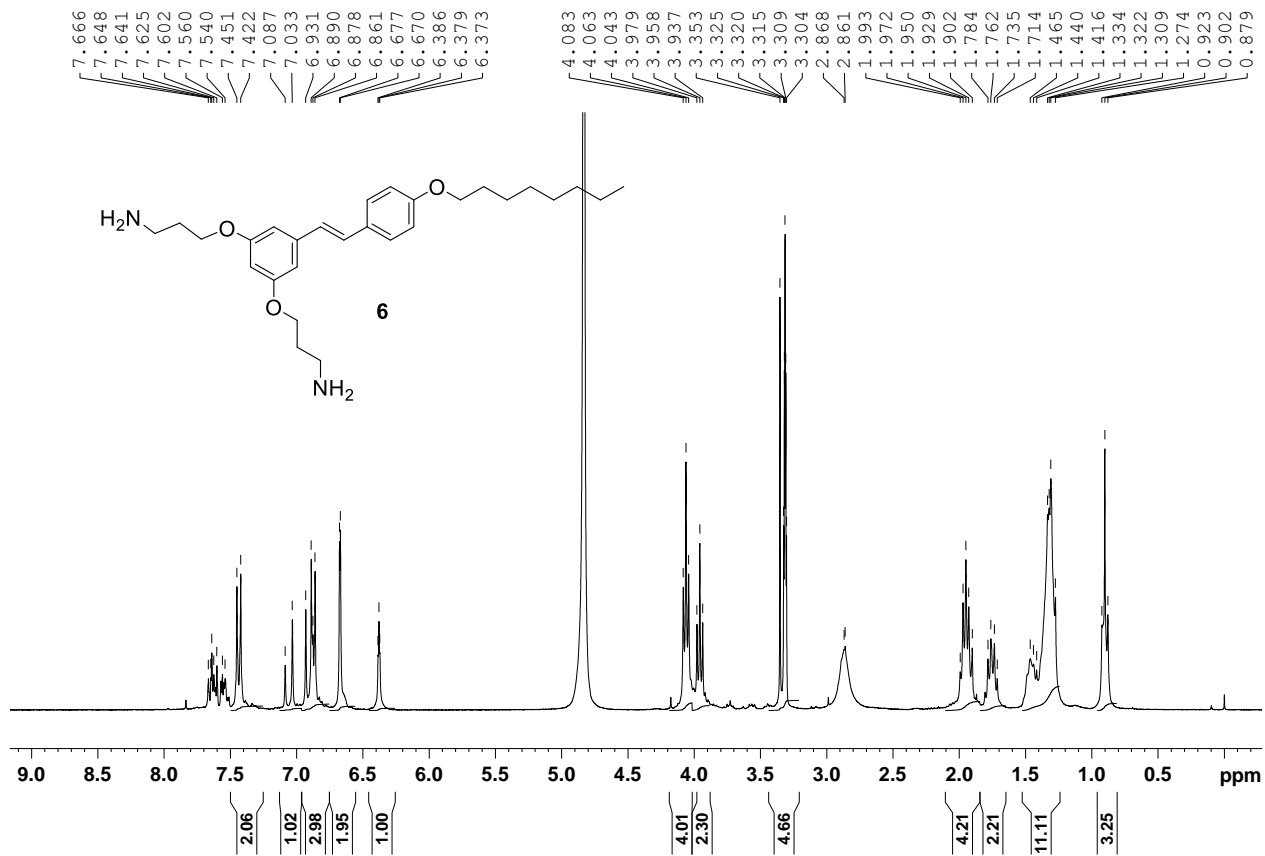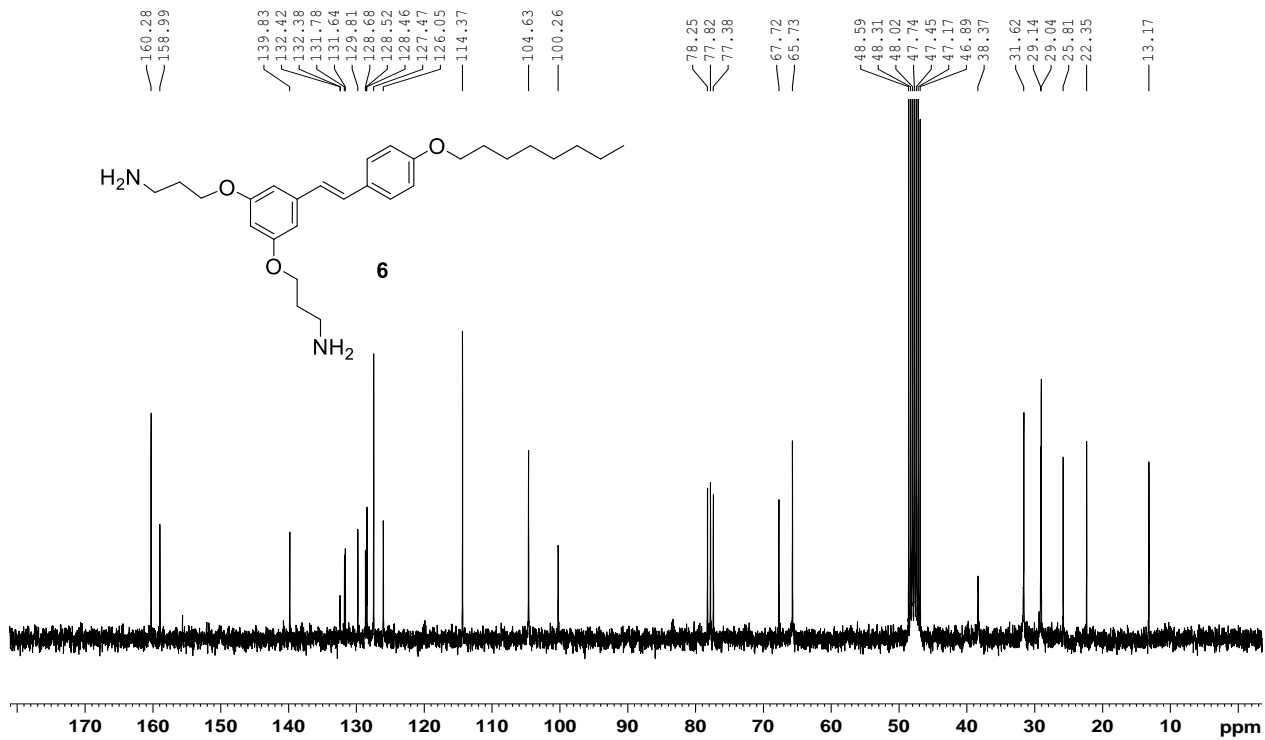

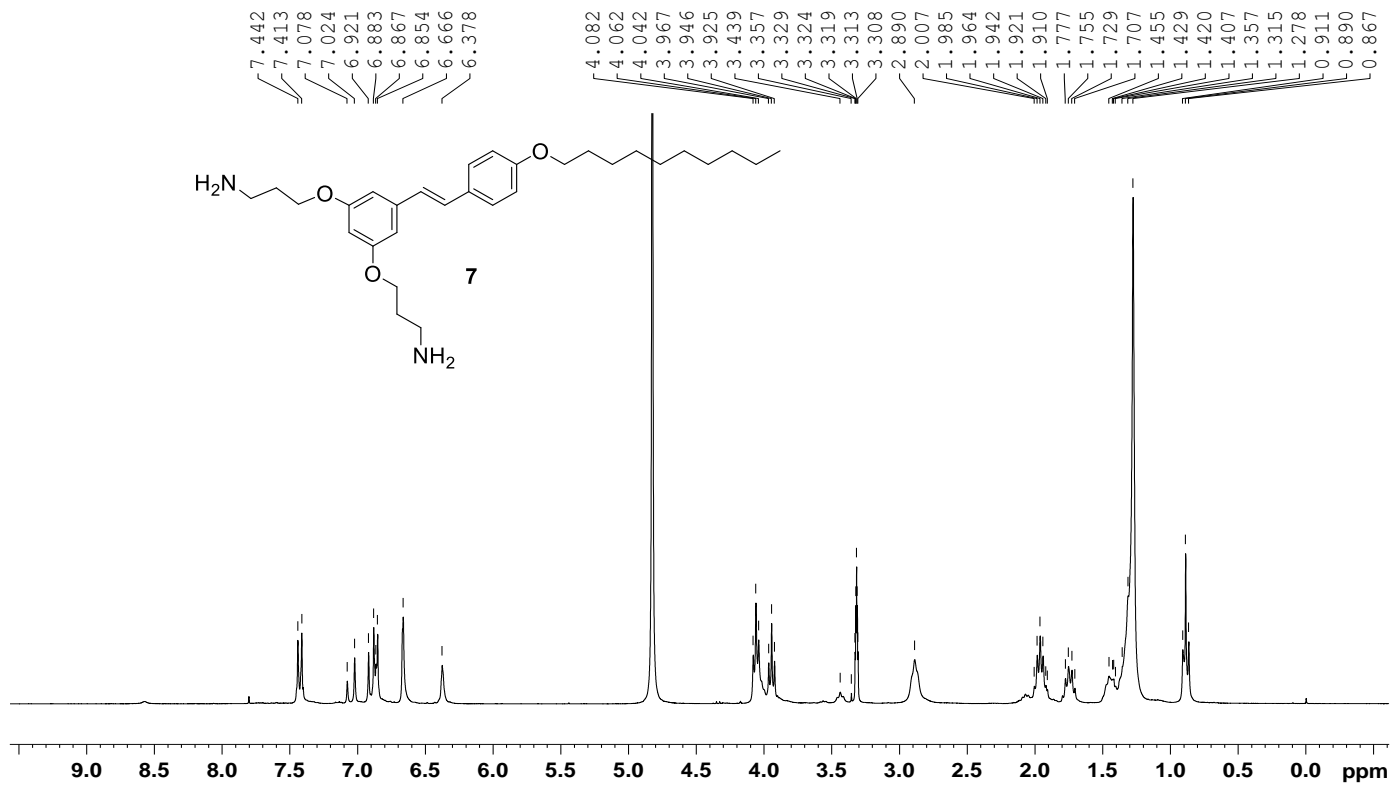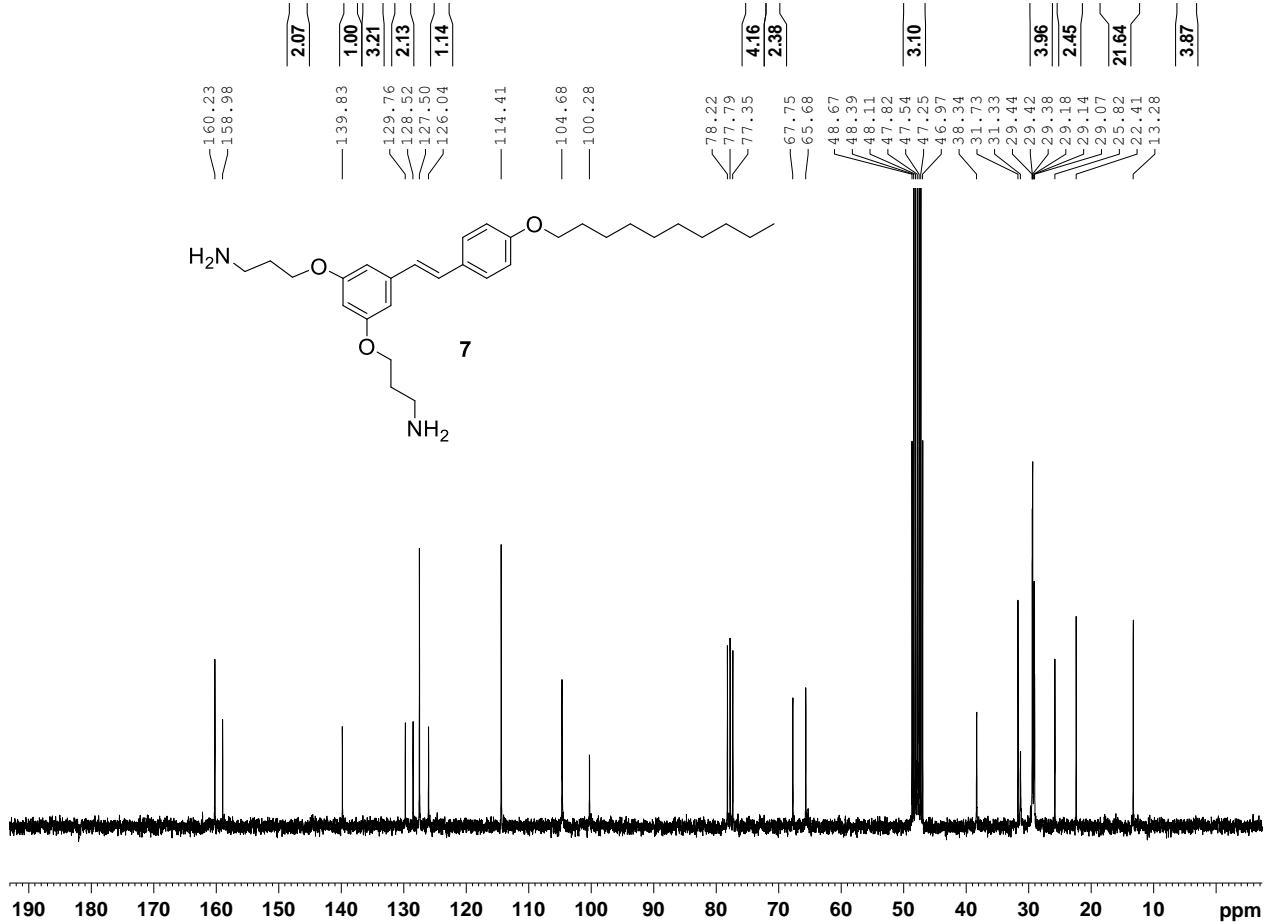

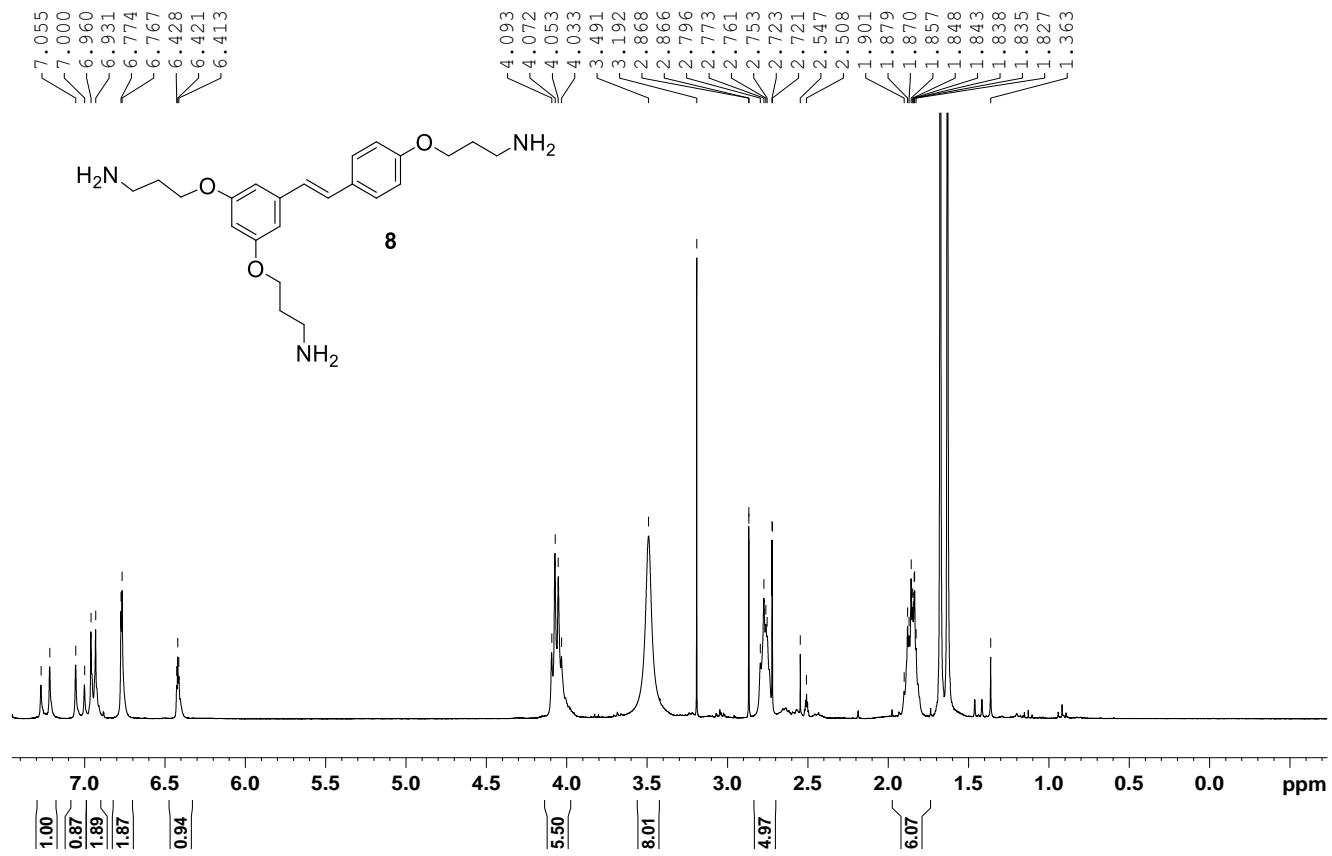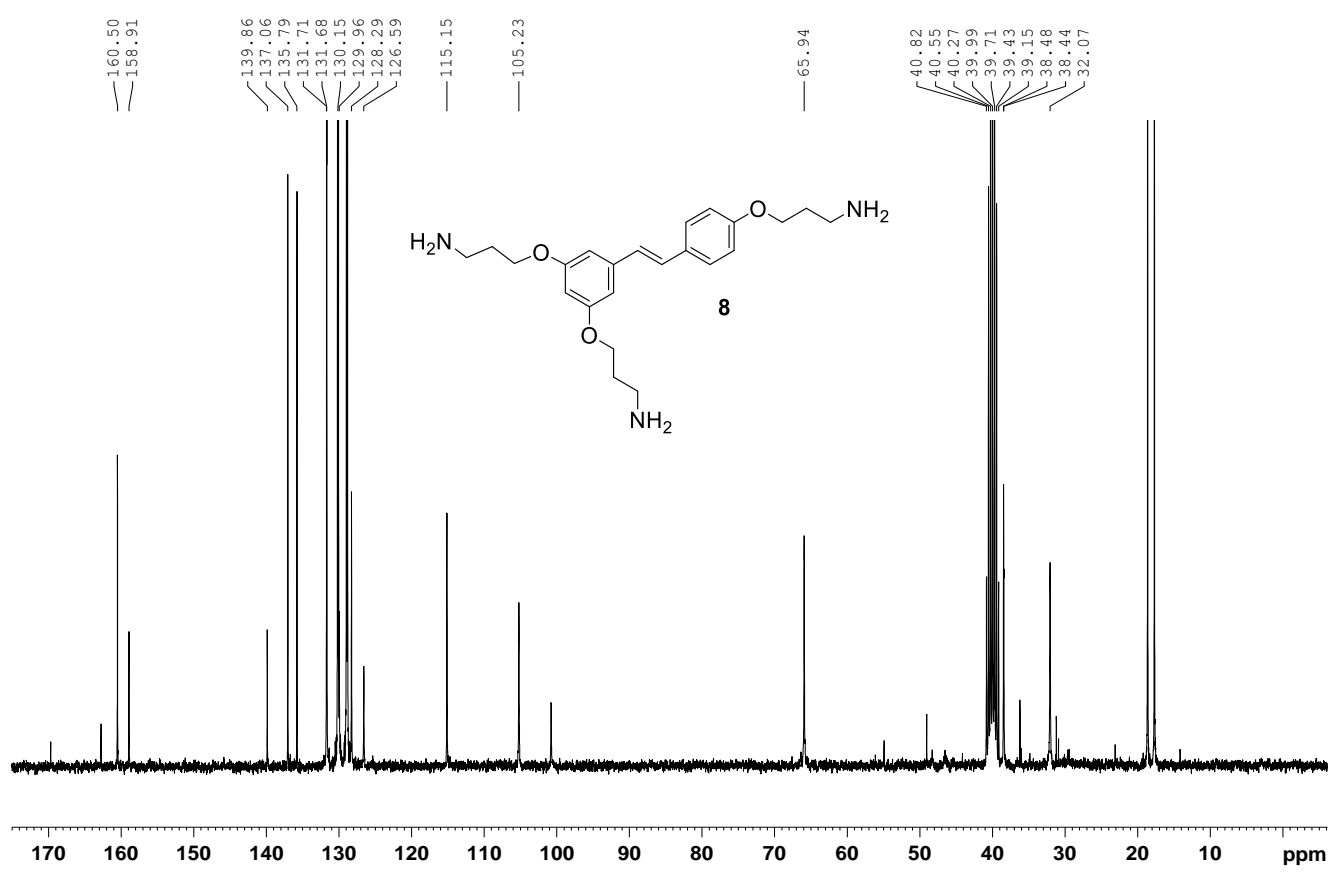

## High resolution MS of final products

Compound 2 ( $C_{17}H_{20}NO_3$   $[M+H]^+$ )

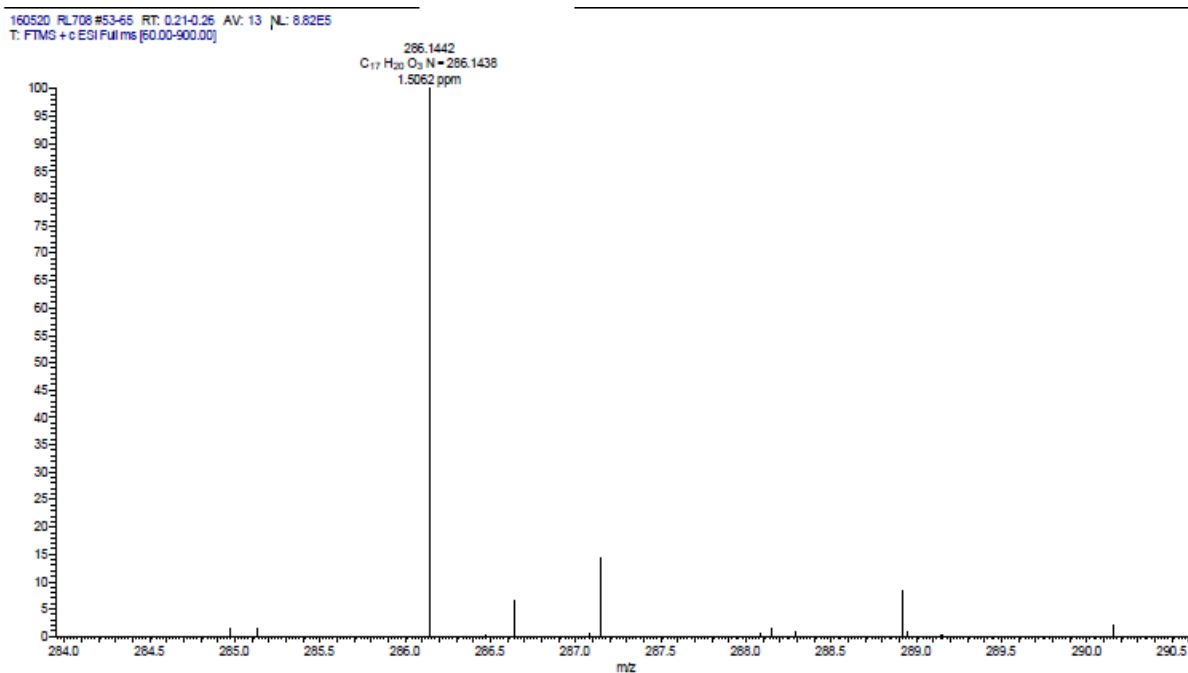

Compound 3 ( $C_{25}H_{36}NO_3$   $[M+H]^+$ ):

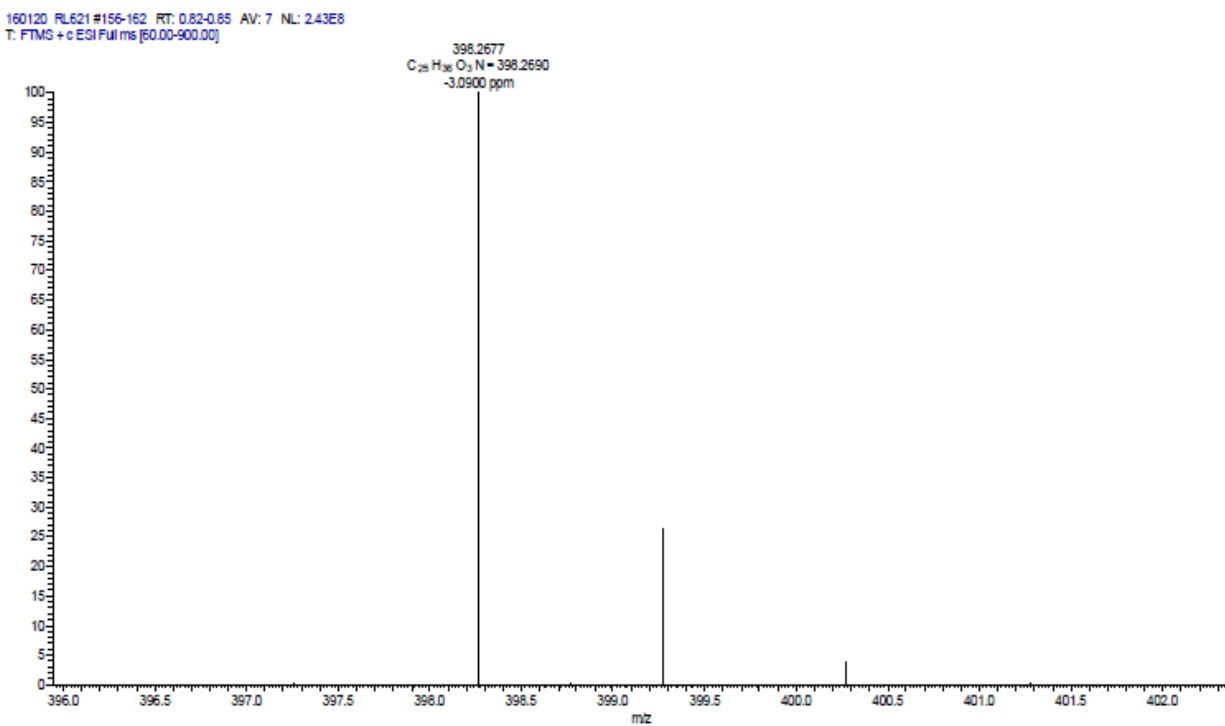

Compound 4 (C<sub>24</sub>H<sub>34</sub>N<sub>2</sub>O<sub>3</sub> [M+H]<sup>+</sup>):

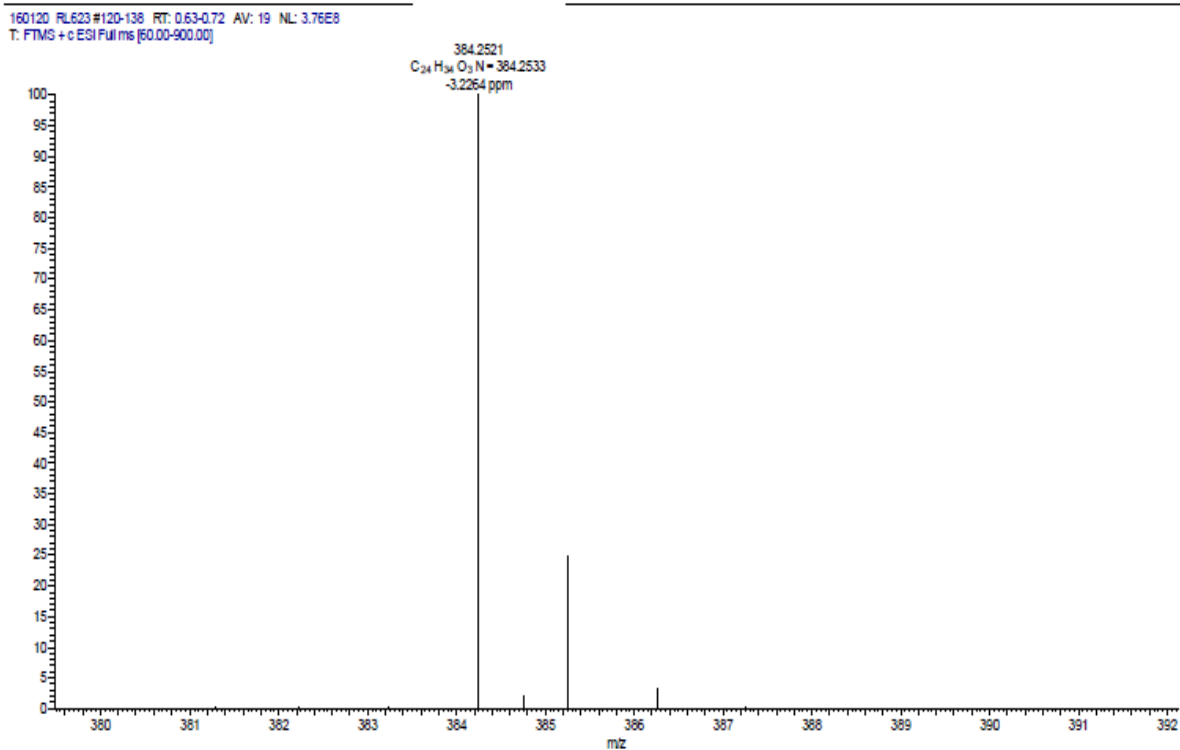

Compound 5 (C<sub>24</sub>H<sub>35</sub>N<sub>2</sub>O<sub>3</sub> [M+H]<sup>+</sup>):

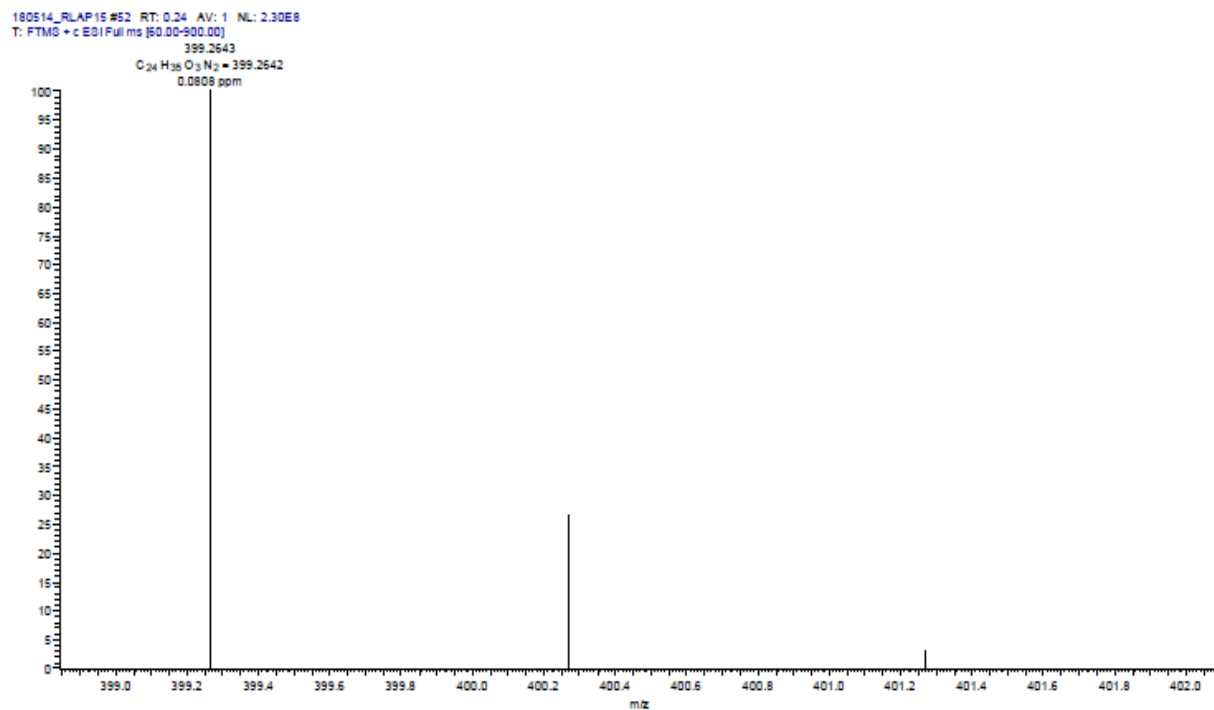



Compound **6** (C<sub>28</sub>H<sub>43</sub>N<sub>2</sub>O<sub>3</sub> [M+H]<sup>+</sup>):

190604\_RL784 #84-100 RT: 0.41-0.50 AV: 17 NL: 4.02E8  
T: FTMS + c ESI Full ms [50.00-900.00]

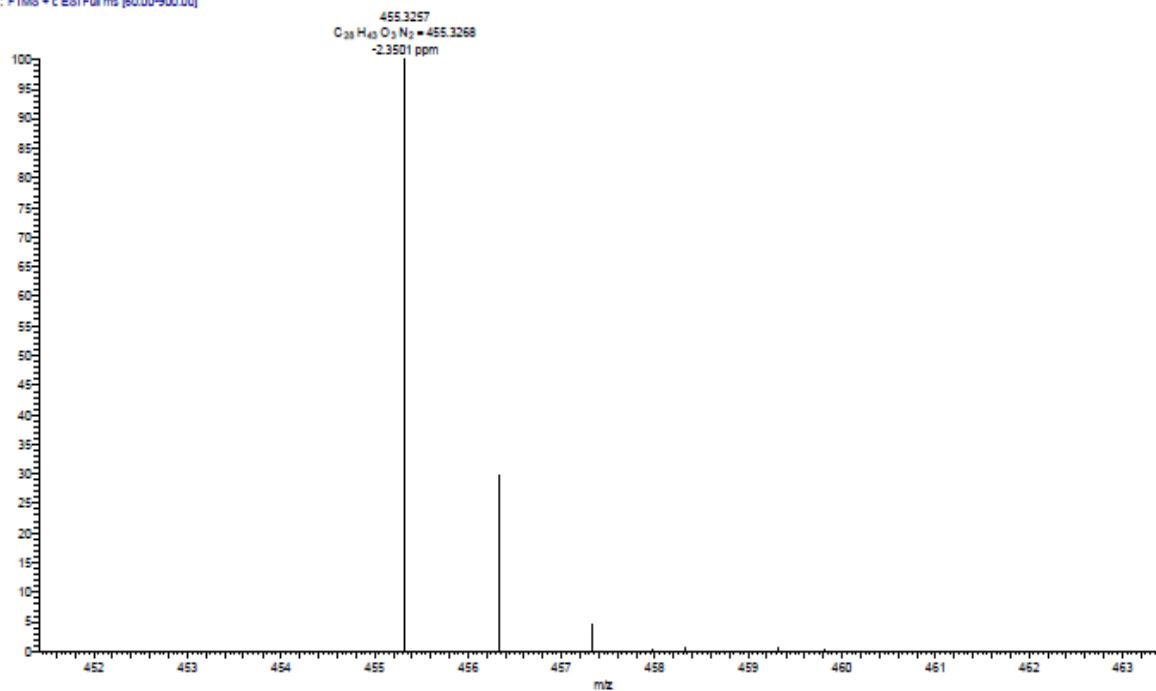

Compound **8** (C<sub>23</sub>H<sub>36</sub>N<sub>3</sub>O<sub>3</sub> [M+H]<sup>+</sup>):

1: TOF MS ES+

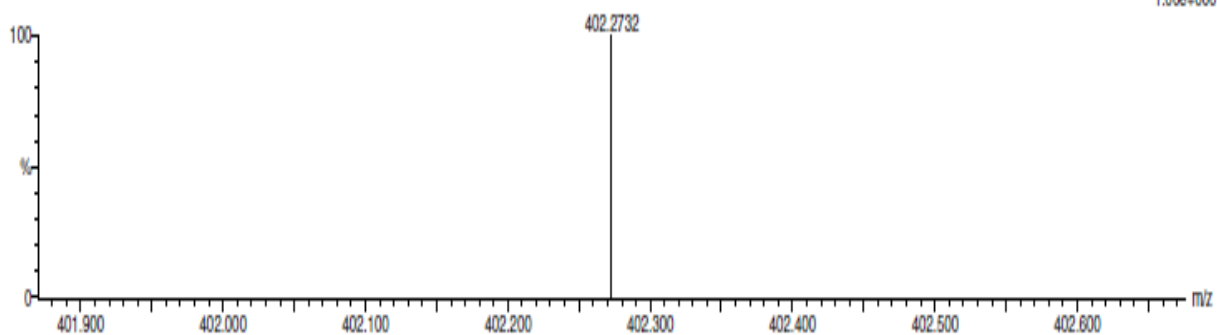

## HPLC chromatograms of final compounds 2-8

### Compound 2

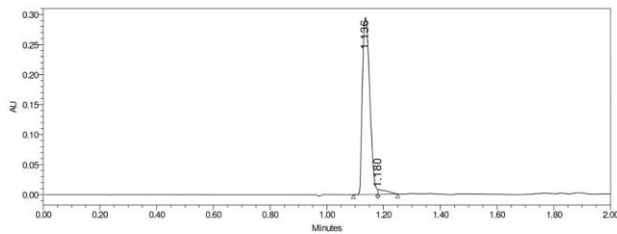

**Peak Name:**

|           | Injection | RT    | Area   | % Area | Height |
|-----------|-----------|-------|--------|--------|--------|
| 1         | 1         | 1.180 | 17104  | 3.10   | 8009   |
| 2         | 1         | 1.136 | 534821 | 96.90  | 294818 |
| Mean      |           | 1.158 |        |        |        |
| Std. Dev. |           | 0.031 |        |        |        |
| % RSD     |           | 2.68  |        |        |        |

### Compound 3

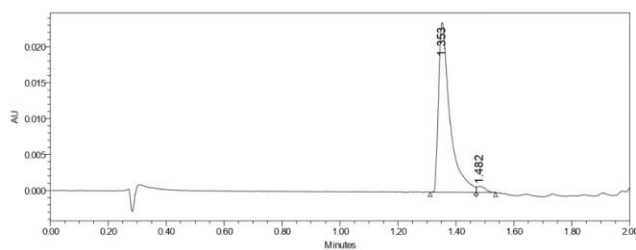

**Peak Name:**

|           | Injection | RT    | Area  | % Area | Height |
|-----------|-----------|-------|-------|--------|--------|
| 1         | 1         | 1.482 | 1717  | 2.58   | 856    |
| 2         | 1         | 1.353 | 64818 | 97.42  | 23638  |
| Mean      |           | 1.417 |       |        |        |
| Std. Dev. |           | 0.091 |       |        |        |
| % RSD     |           | 6.44  |       |        |        |

### Compound 4

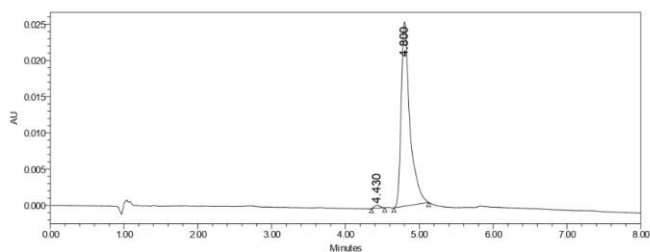

**Peak Name:**

|           | Injection | RT    | Area   | % Area | Height |
|-----------|-----------|-------|--------|--------|--------|
| 1         | 1         | 4.800 | 207639 | 99.00  | 25433  |
| 2         | 1         | 4.430 | 2094   | 1.00   | 401    |
| Mean      |           | 4.615 |        |        |        |
| Std. Dev. |           | 0.282 |        |        |        |
| % RSD     |           | 5.68  |        |        |        |

## Compound 5

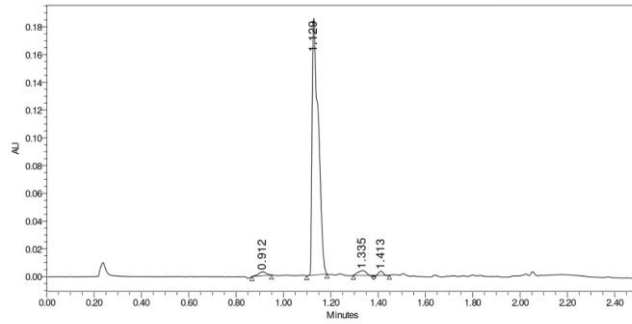

Processed Channel: PDA 280.0 nm

| SampleName         | Processed Channel | Retention Time (min) | Area   | % Area | Height |
|--------------------|-------------------|----------------------|--------|--------|--------|
| 1 220517_API5_Puro | PDA 280.0 nm      | 0.912                | 6537   | 1.84   | 2879   |
| 2 220517_API5_Puro | PDA 280.0 nm      | 1.129                | 334751 | 94.45  | 185138 |
| 3 220517_API5_Puro | PDA 280.0 nm      | 1.335                | 8716   | 2.46   | 3441   |
| 4 220517_API5_Puro | PDA 280.0 nm      | 1.413                | 4422   | 1.25   | 2911   |

## Compound 6

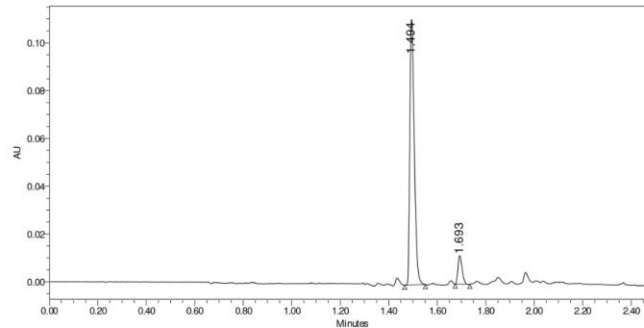

Processed Channel: PDA 280.0 nm

| SampleName       | Processed Channel | Retention Time (min) | Area   | % Area | Height |
|------------------|-------------------|----------------------|--------|--------|--------|
| 1 220517_RL784_C | PDA 280.0 nm      | 1.494                | 143085 | 90.98  | 11114  |
| 2 220517_RL784_C | PDA 280.0 nm      | 1.693                | 14194  | 9.02   | 11872  |

## Compound 7

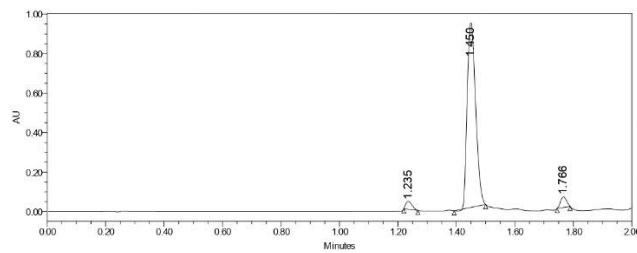

Peak Name:

|           | Injection | RT    | Area    | % Area | Height |
|-----------|-----------|-------|---------|--------|--------|
| 1         | 1         | 1.450 | 1880293 | 93.29  | 934434 |
| 2         | 1         | 1.235 | 59416   | 2.95   | 40181  |
| 3         | 1         | 1.766 | 75826   | 3.76   | 53543  |
| Mean      |           | 1.484 |         |        |        |
| Std. Dev. |           | 0.267 |         |        |        |
| % RSD     |           | 18.00 |         |        |        |

# Compound 8

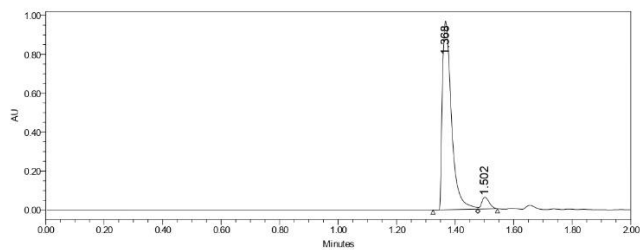

Peak Name:

|           | Injection | RT    | Area    | % Area | Height |
|-----------|-----------|-------|---------|--------|--------|
| 1         | 1         | 1.502 | 106773  | 4.82   | 59711  |
| 2         | 1         | 1.368 | 2107288 | 95.18  | 970188 |
| Mean      |           | 1.435 |         |        |        |
| Std. Dev. |           | 0.095 |         |        |        |
| % RSD     |           | 6.61  |         |        |        |
